# Supplementary material for: Chemical profiles with cardioprotective and anti-depressive effects of Morus macroura Miq. leaves and stem branches dichloromethane fractions on isoprenaline induced post-MI depression
Source: PubMed Central journal article supplement — RSC Adv. 2022 Jan 26;12(6):3476–93. doi: 10.1039/d1ra08320a (PMC8979319; doi:10.1039/d1ra08320a), 2022-01-26
Supplement: RA-012-D1RA08320A-s001.pdf [file RA-012-D1RA08320A-s001.pdf]

### Supplementary materials:

**Text S1: Compound 1** [pentacos-7-ene]: (500 mg) white waxy substance;  $R_f$ : 0.69 and 0.85 by using solvent systems (100% Light petroleum) and (Light petroleum:  $\text{CH}_2\text{Cl}_2$  90:10),  $^1\text{H-NMR}$  ( $\text{CDCl}_3$ , 400 MHz) spectral analyses were carried out by: JEOL at 500 MHz and Bruker at 400 MHz and chemical shifts were given in ppm with the TMS as internal standard:  $\delta_{\text{H}}$  5.32 (2H, br s, H-7, H-8), 0.91(6H, t, H-1,25,  $J= 7.2$  Hz), 1.00-1.30 (42H, m, H2-6 and H9-24); EI-MS that carried out on Jeol JMS-AX 500, 70 ev. displayed  $m/z$  (% relative abundance) as follow: 351 ( $\text{M}^+\text{+H}$ , 1), 350 ( $\text{M}^+$ , 0.05), 322.28 ( $\text{M}^+\text{+H-C}_2\text{H}_5$ ,1.5), 308 (322- $\text{CH}_2$ , 0.5), 295 (1.5), 294 (322- $\text{C}_2\text{H}_4$ , 0.3), 280 (322- $\text{C}_3\text{H}_6$ , 0.1), 266 (322- $\text{C}_4\text{H}_8$ , 0.07), 252 (322- $\text{C}_5\text{H}_{10}$ , 0.1), 211 (1.6), 183 (2.2), 155 (2.3), 127 (3.4), 125 (23), 111 (42), 97 (65), 85 (87),71 (100).

**Text S2: Compound 2** [Nonatriacontanoic acid]: (100 mg) white crystalline scales;  $R_f$ : 0.55 & 0.73 using solvent systems (Light petroleum: $\text{CH}_2\text{Cl}_2$  75:25) & (100%  $\text{CH}_2\text{Cl}_2$ );  $^1\text{H-NMR}$  ( $\text{CDCl}_3$ , 400 MHz): $\delta_{\text{H}}$  2.33 ( 2H, t, H-2,  $J=8.0\text{Hz}$ ), 1.63 (2H, m, H-3), 1.25 (66H, m, H-4-36), 1.25 (2H, m, H-37), 1.56 (2H, m, H-38), 0.86 (3H,t, H-39),  $^{13}\text{C-NMR}$  ( $\text{CDCl}_3$ , 100MHz);  $\delta_{\text{C}}$ 176.94 (COOH), 33.64 (C-2), 32.08 (C-3), 29.85 ( C-4 : C-36), 24.87 (C-37), 22.84 (C-38), 14.26 (C-39); EI-MS  $m/z$  (% relative abundance): 578 ( $\text{M}^+$ ,1.62), 577 (3.83), 563 ( $\text{M}^+\text{-CH}_3$ , 1.84), 549 ( $\text{M}^+\text{-C}_2\text{H}_5$ , 1.02), 534 ( $\text{M}^+\text{-COO}$ , 1.16), 520 (534-  $\text{CH}_2$ , 1.02), 506 (534- $\text{C}_2\text{H}_4$ , 0.06), 396 (5.59), 313 (32.81), 236 (47.94), 98 (91.02), 83 (82.21), 57 ( $\text{C}_4\text{H}_9$ ,100.00).

**Text S3: Compound 3** [Melissic acid (Triacontanoic acid)]: (400 mg) white amorphous substance;  $R_f$ : 0.53 [ $\text{CH}_2\text{Cl}_2$ : MeOH (9.8: 0.2)],  $R_f$ : 0.50, 0.64 by using solvent systems (Light petroleum: $\text{CH}_2\text{Cl}_2$  75:25) & (100%  $\text{CH}_2\text{Cl}_2$ );  $^1\text{H-NMR}$  ( $\text{CDCl}_3$ , 400 MHz):  $\delta_{\text{H}}$  2.35 (2H, t, H-2,  $J = 8.0$  Hz), 1.67 (2H, m, H-3), 1.65 (2H, m, H-4), 1.63 (2H, m, H-5, H-6), 1.60 (2H, m, H-7), 1.55

(2H, m, H-8), 1.25 (38H, m, H-9-27), 1.25 (2H, m, H-28), 1.25 (2H, m, H-29), 0.89 (3H, t, H-30,  $J = 8.0$  Hz),  $^{13}\text{C-NMR}$  ( $\text{CDCl}_3$ , 100MHz);  $\delta_{\text{C}}$  176.82 (C=O), 33.65 (C-2), 24.89 (C-3), 29.22 (C-4), 29.39 (C-5, C-6), 29.51 (C-7), 29.59 (C-8), 29.85 (C-9 – C-27), 32.08 (C-28), 22.84 (C-29), 14.27 (C-30), 51.05 (C-O); EI-MS  $m/z$  (% relative abundance): 453.21 ( $\text{M}^+\text{H}$ , 0.5), 452 ( $\text{M}^+$ , 4.17), 424 ( $\text{M}^+\text{H-C}_2\text{H}_5$ , 13.13), 408 ( $\text{M}^+\text{H-COOH}$ , 0.5), 396 ( $424\text{-C}_2\text{H}_4$ , 71.90), 354 ( $396\text{-C}_3\text{H}_6$ , 9.63), 353 (38.15), 297 ( $354\text{-C}_4\text{H}_8\text{H}$ , 32.87), 278 (10.42), 187 (7.86), 129 (61.82), 97 (58.93), 71 (63.26), 57 (100), 45 (77.19).

**Text S4: Compound 4** [Cerotic acid (Hexacosanoic acid)]: (100 mg) white granules;  $R_f$ : 0.42, 0.54 by using solvent system (Light petroleum: $\text{CH}_2\text{Cl}_2$  75:25) & (100%  $\text{CH}_2\text{Cl}_2$ );  $^1\text{H-NMR}$  ( $\text{CDCl}_3$ , 400 MHz):  $\delta_{\text{H}}$  2.36 (2H, t, H-2,  $J = 8.0$  Hz), 1.63 (2H, m, H-3), 1.25 (40H, m, H-4-24), 1.25 (2H, m, H-25), 0.86 (3H, t, H-26,  $J = 8.0$  Hz),  $^{13}\text{C-NMR}$  ( $\text{CDCl}_3$ , 100MHz);  $\delta_{\text{C}}$  177.3 (C=O), 36.28 (C-2), 24.87 (C-3), 29.59 (C-4 – C-24), 22.85 (C-25), 14.27 (C-26), 51.05 (C-O) ; EI-MS  $m/z$  (% relative abundance): 396 ( $\text{M}^+$ , 100), 381 ( $\text{M}^+\text{-CH}_3$ , 15.65), 354 (3.64), 288 (12.22), 255 (16.98), 213 (8.54), 161 (8.66), 147 (32.06), 95 (25.53), 85 (31.77), 69 (27.64), 57 (34.32).

**Text S5: Compound 5** [Palmitic acid]: (200 mg) white crystalline scales; m.p. 63-64 °C;  $R_f$  0.22 & 0.40 using solvent systems (Light petroleum: $\text{CH}_2\text{Cl}_2$  75:25 & (100%  $\text{CH}_2\text{Cl}_2$ );  $^1\text{H-NMR}$  ( $\text{CDCl}_3$ , 400 MHz):  $\delta_{\text{H}}$  2.33 (2H, t, H-2,  $J = 8.0$  Hz), 1.63 (2H, m, H-3), 1.25 (20H, m, H-4-13), 1.25 (2H, m, H-14), 1.56 (2H, m, H-15), 0.88 (3H, t, H-16,  $J = 8.0$  Hz),  $^{13}\text{C-NMR}$  ( $\text{CDCl}_3$ , 100MHz);  $\delta_{\text{C}}$  176.94 (C=O), 33.64 (C-2), 32.08 (C-3), 29.85 (C-4 - C-13), 24.87 (C-14), 22.84 (C-15), 14.26 (C-16); EI-MS  $m/z$  (relative abundance %): 256 ( $\text{M}^+$ , 2.08), 227 ( $\text{M}^+\text{-C}_2\text{H}_5$ , 1.14), 213 ( $\text{M}^+\text{-C}_3\text{H}_6\text{H}$ , 2.62), 185 (2.84), 149 (7.25), 129 (7.80), 121 (9.61), 97 (11.27), 83 (16.02), 69 (72.17) and 40 (100).

**Text S6: Compound 6** [Lupeol palmitate]: (200 mg) white needles; m.p. 110-112 °C,  $R_f$  0.78 & 0.85 by using solvent system ( $\text{CH}_2\text{Cl}_2$ :MeOH 99:1) & ( $\text{CH}_2\text{Cl}_2$ :MeOH 98:2).  $^1\text{H-NMR}$  ( $\text{CDCl}_3$ , 400 MHz):  $\delta_{\text{H}}$  4.26 (1H, dd, H-3,  $J = 6.0, 12.0$  Hz), 5.8 (1H, m, H-9'), 5.01 (1H, m, H-10'), 4.69, 4.57 (2H, s, H-29a, H-29b), 2.39, 2.41 (2H, t, H-2',  $J = 7.2$  Hz), 2.31 (1H, t, H-19,  $J = 1.8$  Hz), 1.68 (3H, s, H-30), 1.57 (2H, m, H-3'), 0.94 (3H, s, H-23), 0.89 (3H, s, H-24), 0.83 (3H, s, H-25), 0.79 (3H, s, H-26), 0.76 (3H, s, H-27), 0.76 (3H, t, H-16'),  $^{13}\text{C-NMR}$  ( $\text{CDCl}_3$ , 100MHz);  $\delta_{\text{C}}$  38.89 (C-1), 23.90 (C-2), 79.17 (C-3), 37.33 (C-4), 55.45 (C-5), 18.15 (C-6), 34.44 (C-7), 40.99 (C-8), 50.60 (C-9), 38.21 (C-10), 21.08 (C-11), 25.30 (C-12), 38.21 (C-13), 42.99 (C-14), 27.57 (C-15), 35.74 (C-16), 43.16 (C-17), 48.46 (C-18), 48.14 (C-19), 151.14 (C-20), 29.85 (C-21), 40.16 (C-22), 28.14 (C-23), 16.27 (C-24), 16.13 (C-25), 15.52 (C-26), 15.50 (C-27), 18.47 (C-28), 109.47 (C-29), 19.31 (C-30), 167.91 (C=O), 32.08 (C-1'), 25.30 (C-2'), 29.08 (C-3'), 29.51 (C-4'-C-8'), 131.03 (C-9'), 132.61 (C-10'), 30.51 (C-11'), 22.84 (C-12'), 33.97 (C-13'), 23.14 (C-14'), 22.84 (C-15'), 21.08 (C-16'); EI-MS  $m/z$  (relative abundance %): 662 [ $\text{M}^+$ , 0.83], 647 ( $\text{M}^+ - \text{CH}_3$ , 0.5), 426 [ $\text{M}^+ - \text{palmitic acid}$ , 13.27], 411 (9.53), 316 (7.06), 267 (7.17), 239 (10.95), 219 (19.97), 218 (77.01), 189 (73.36), 147 (43.69), 135 (70.01), 109 (85.65), 95 (100), 81 (84.14), 69 (81.63), 54 (61.05).

**Text S7: Compound 7** [Lupeol acetate]: (500 mg) white needles; m.p: 216-218 °C and  $R_f$  values 0.43 and 0.55 by using solvent systems ( $\text{CH}_2\text{Cl}_2$ :MeOH 99:1) & ( $\text{CH}_2\text{Cl}_2$ :MeOH 98:2).  $^1\text{H-NMR}$  ( $\text{CDCl}_3$ , 400 MHz):  $\delta_{\text{H}}$  4.46 (1H, m, H-3), 4.68, 4.56 (2H, s, H-29b, H-29a, respectively), 2.05 (3H, s,  $\text{CH}_3\text{OCO}$ ), 2.04 (1H, m, H-19), 1.68 (3H, s, H-30), 1.03 (3H, s, H-25), 0.94 (3H, s, H-28), 0.85 (3H, s, H-23), 0.84 (3H, s, H-24), 0.83 (3H, s, H-26), 0.79 (3H, s, H-27),  $^{13}\text{C-NMR}$  ( $\text{CDCl}_3$ , 100MHz);  $\delta_{\text{C}}$  38.62 (C-1), 21.56 (C-2), 81.13 (C-3), 38.20 (C-4), 55.54 (C-5), 18.36 (C-6), 34.37 (C-7), 41 (C-8), 50.50 (C-9), 37.3 (C-10), 21.10 (C-11), 23.85 (C-12), 36.95 (C-13), 42.98 (C-14),

25.26 (C-15), 35.73 (C-16), 43.16 (C-17), 48.44 (C-18), 48.19 (C-19), 151.13 (C-20), 29.99 (C-21), 40.15 (C-22), 27.59 (C-23), 16.89 (C-24), 16.65 (C-25), 16.34 (C-26), 14.66 (C-27), 18.16 (C-28), 109.51 (C-29), 19.45 (C-30), 171.18 (C=O), 28.19 (CH<sub>3</sub> of acetyl group); EI-MS *m/z* (relative abundance %): 468[M<sup>+</sup>, 7.33], 426 [M<sup>+</sup>-acetate, 2.1], 393(5.27), 257(3.96), 229(5.27), 218(100), 203(57.32), 189(49.82), 147 (15.91), 121(22.55), 107 (24.29), 81 (32.94), 69 (43.28) and 43 (59.46).

**Text S8: Compound 8** [ $\beta$ -sitosterol]: (500 mg) colorless crystals; m.p. 136-140°C; R<sub>f</sub> 0.65 and 0.83 using solvent systems (CH<sub>2</sub>Cl<sub>2</sub>:MeOH 95:5) & (CH<sub>2</sub>Cl<sub>2</sub>:MeOH 85:15); <sup>1</sup>H-NMR (CDCl<sub>3</sub>, 400 MHz):  $\delta_{\text{H}}$  3.52 (1H, m, H-3), 5.34 (1H, t, H-6) *J*=5.2 Hz, 1.03 (3H, s, H-18), 0.91 (3H, d, *J*= 8.0 Hz, H-21), 0.89 (3H, t, *J*= 7.2 Hz, H-24), 0.84 (3H, t, *J*= 7.2 Hz, H-29), 0.82 (3H, d, *J*= 7.2 Hz, H-27), 0.80 (3H, d, *J*= 7.2 Hz, H-26), 0.68 (3H, s, H-19), 0.68 (2H, m, H-28), <sup>13</sup>C-NMR (CDCl<sub>3</sub>, 100MHz);  $\delta_{\text{C}}$  37.41 (C-1), 31.82 (C-2), 71.97 (C-3), 42.46 (C-4), 140.91 (C-5), 121.88 (C-6), 32.06 (C-7, C-8), 50.29 (C-9), 36.66 (C-10), 21.24 (C-11), 39.93 (C-12), 42.47 (C-13), 56.92 (C-14), 26.22 (C-15), 28.40 (C-16), 56.21 (C-17), 36.30 (C-18), 19.18 (C-19), 34.10 (C-20), 24.46 (C-21), 45.99 (C-22), 23.22 (C-23), 12.13 (C-24), 29.30 (C-25), 19.97 (C-26), 19.55 (C-27), 18.93 (C-28), 12.01 (C-29); EI-MS *m/z* (relative abundance %): 414 (M<sup>+</sup>, 59.88%), 396 (M<sup>+</sup>-H<sub>2</sub>O, 32.87%), 381 (M<sup>+</sup>-H<sub>2</sub>O-CH<sub>3</sub>, 28.23%), 329 (91.62%), 303 (90.25%), 273 (59.75%), 255 (59.65%), 213 (49.10%), 145(62.34%), 107(87.64%), 105(72.50%), 79(66.87%), 55(74.61%) and 43(100%).

**Text S9: Compound 9** [ $\beta$ -sitosterol-3-O- $\beta$ -D-glucopyranoside]: (2 g) white powder; R<sub>f</sub> values 0.33 & 0.48 by using solvent systems (CH<sub>2</sub>Cl<sub>2</sub>: MeOH 95:5) & (CH<sub>2</sub>Cl<sub>2</sub>: MeOH 85:15); <sup>1</sup>H-NMR (CDCl<sub>3</sub>, 400 MHz):  $\delta_{\text{H}}$  5.34 (1H, m, H-6) *J*=5.2 Hz, 4.44 (2H, dd, *J*= 2.5, 11.77, H-6'), 4.22 (1H, m, H-1'), 3.64 (1H, m, H-3), 2.36 (2H, m, H-4) *J*=5.2 Hz, 2.13 (2H, m, H-15), 1.95 (1H, m, H-14), 1.81 (2H, m, H-7), 1.64 (4H, m, H-2, H-12), 1.64 (1H, m, H-25), 1.48 (2H, m, H-11), 1.43

(1H, m, H-20), 1.30 (4H, m, H-1, H-28), 1.30 (1H, m, H-8), 1.24 (4H, m, H-16, H-23), 1.16 (1H, m, 17), 0.66 (3H, s, H-18), 0.92 (3H, s, H-19), 0.96 (3H, m, H-21), 0.90 (1H, m, H-24), 0.97 (3H, t,  $J = 7.2$  Hz, H-29), 0.90 (3H, d,  $J = 8$  Hz, H-27), 0.83 (3H, d,  $J = 8$  Hz, H-26), 0.84 (1H, m, H-9), 2.91-3.36 (sugar protons; ESI-MS in positive mode MS  $m/z$  (relative abundance %): 577 ( $M^+ + 1$ , 100.00) and 415 ( $M^+ + H - 162$ , 16.23).

### **Text S10: Identification of phenolic acids and phenolic acid glycosides:**

**Compounds 1** and **3** showed molecular ion peaks at  $m/z$  137, and 153  $[M-H]^+$  and base peak fragments at  $m/z$  93  $[M-H-COO]$  and 109 were suggested to be hydroxybenzoic acid and protocatecheic acid, respectively.<sup>1</sup> In addition, **compound 6** was identified as coumaric acid from MS<sup>1</sup> at  $m/z$  163  $[M-H]^+$  and MS<sup>2</sup> at  $m/z$  119 due to loss of carboxylic group.<sup>2</sup> Finally, **compound 22** exhibited  $[M-H]^-$  at  $m/z$  301 and MS<sup>2</sup> base peak fragment ion at  $m/z$  139 (100%) in addition to fragments at  $m/z$  256 (35%) and 228 (30%), comparing these results with those previously published data, compound **22** was identified as ellagic acid.<sup>2</sup> All the above compounds were identified for the first time in *M. macroura*.

The molecular ion  $[M-H]^+$  of **compound 23** was observed at  $m/z$  355, and the base peak at  $m/z$  193.3 was detected due to the loss of glucoside unit (162 amu) in the MS<sup>2</sup> spectrum. Hence, this compound was identified as ferulic acid-*O*-glucoside.<sup>2</sup> Additionally, **compound 29** showed a molecular ion peak at  $m/z$  329  $[M-H]^+$ , MS<sup>2</sup> at  $m/z$  287 attributed to  $[M-H-COCH_3]$ , which suggested to be phloracetophenone-4-*O*-glucoside,<sup>3</sup> and it was isolated as a pure compound in the current work. However, To our knowledge, ferulic acid-*O*-glucoside and phloracetophenone-4-*O*-glucoside, were identified for the first time in the family Moraceae.

### **Text S11: Identification of other phenolic compounds**

**Compound 4** showed a molecular ion peak at  $m/z$  339  $[M-H]^+$  and fragment ion at  $m/z$  177 (loss of 163 amu), besides other diagnostic peaks for morachalcone A at  $m/z$  175, 161, 135, 109.<sup>4</sup> Moreover, compound **47** showed a molecular ion peak at  $m/z$  391  $[M+H]^+$  and significant MS<sup>2</sup> fragment ion at  $m/z$  279 that attributed to dibutyl phthalate, 167 corresponding to phthalic acid and base peak at  $m/z$  149, this compound was suggested to be bis (2-ethyl hexyl) phthalate,<sup>5</sup> which was isolated as a pure compound in this work. All compounds are the first report in *M. macroura*, while bis (2-ethyl hexyl) phthalate is identified for the first time in the family Moraceae.

#### **Text S12: Identification of flavonoid aglycones**

The deprotonated molecular ion at  $m/z$  301 was detected for compounds **25** and **26**, where, **peak 25** which showed MS<sup>2</sup> fragmentation at  $m/z$  179, 151, and 121, was suggested to be quercetin. However, MS<sup>2</sup> fragment ions at  $m/z$  256, 151, 107 were matched with morin (**26**).<sup>2</sup> Thus, these compounds were identified for the first time in *M. macroura*.

#### **Text S13: Identification of flavonoid O- and C-glycosides:**

Five peaks **5**, **10**, **15**, and **24** at  $R_t$  6.27, 7.62, 8.53, 8.96, and 12.17 min, respectively, showed the same molecular ion peak at  $m/z$  431  $[M-H]^-$ . Where peaks **5**, **15** were identified as apigenin-*O*-glucoside and its isomer depending upon MS<sup>2</sup> fragmentation that gave a base peak at  $m/z$  269 by the loss of glucosyl residue (162 amu).<sup>6</sup> While MS<sup>2</sup> of compound **10** gave fragment ions at  $m/z$  269.0  $[M-H-162]$ , 341  $[M^+-H-90]$ , and 311  $[M^+-H-120]$  that are characteristic features for mono-*C*-glucoside flavonoid. Moreover, the absence of fragment at  $[M-H-18]$  indicated the presence of 8-*C*-glucoside; therefore, peak **10** was confirmed to be apigenin-8-*C*-glucoside.<sup>7</sup> Additionally, compound **24** was suggested to be kaempferol-*O*-rhamnoside (afzelin) through MS<sup>2</sup> fragment ions at  $m/z$  285, 284 [Loss of sugar moiety], 255, 227.<sup>8</sup> Moreover, compounds **8**, **16**, **17**, and **20**, displayed at retention time 7.26, 8.71, 9.24, 9.24, and 11.14 min, respectively, have the same  $[M-$

H]<sup>-</sup> at  $m/z$  447 with different MS<sup>2</sup> fragmentation patterns. Where, MS<sup>2</sup> of compound 8 exhibited fragment ions at  $m/z$  285 due to loss of glucosyl moiety (162 amu), 257, and 242.5,<sup>6</sup> hence it was identified as luteolin-7-*O*-glucoside. Furthermore, compound **16** showed MS<sup>2</sup> fragment ion at  $m/z$  285 (100%) and 284; therefore, this compound was confirmed to be kaempferol-3-*O*-glucoside.<sup>2</sup> Also, compound 17 showed MS<sup>2</sup> fragment ion at  $m/z$  301 [M-H-rham] and 343 [M-H-104] for [aglycone + 41], which is a characteristic feature of mono-*C*-rhamnoside flavonoid. Moreover, the absence of fragment at [M-H-18] indicated the presence of 8-*C*-rhamnoside,<sup>7</sup> so it was identified as quercetin-8-*C*-rhamnoside. However, compound **20** was identified as quercetin-3-*O*-rhamnoside (quercitrin), depending on the MS<sup>2</sup> fragmentation pattern with characteristic ions at  $m/z$  301 and 255.<sup>9</sup> **Compound 18** ( $R_t$ , 10.95 min) was suggested to be hesperidin which was confirmed by the [M+H]<sup>+</sup> ion at  $m/z$  611 and MS<sup>2</sup> fragments at  $m/z$  303 [M-H-rutinosyl moiety, 308 amu].<sup>10</sup> In addition, three **compounds**, **11**, **13**, and **14**, have the same molecular ion peak at  $m/z$  463 [M-H]<sup>+</sup>, **compound 11** was identified as morin-3-*O*-glucoside from MS<sup>2</sup> fragmentation that showed fragment ions at  $m/z$  301, 257. **Compound 13** was identified as quercetin-3-*O*-glucoside from MS<sup>2</sup> that showed a base peak at  $m/z$  301, indicating the loss of glucose moiety leaving quercetin aglycone.<sup>2</sup> Additionally, compound **14** was suggested to be quercetin-3-*O*-galactoside (Hyperoside) according to MS<sup>2</sup> fragmentation that displayed ion at  $m/z$  301.<sup>11</sup> In addition, compound 38 was identified as chrysoeriol-uronic acid according to the molecular ion peak at  $m/z$  475 [M-H]<sup>-</sup> and MS<sup>2</sup> base peak fragment ion at  $m/z$  299 [Chrysoeriol aglycone].<sup>6</sup> **Compound 39** was identified as naringenin-7-*O*-glucoside,<sup>12</sup> with a molecular ion peak at  $m/z$  433 [M-H]<sup>+</sup> and MS<sup>2</sup> at  $m/z$  271, indicating naringenin moiety. Finally, compound **53** showed a molecular ion peak at  $m/z$  535 [M+H]<sup>-</sup> along with MS<sup>2</sup> data which showed the loss of 218 amu for acetyl glucuronide from the fragment signal at  $m/z$  317 [Isorhamnetin aglycone+H]<sup>+</sup> and 153,<sup>13</sup> so this compound

suggested to be isorhamnetin 3-*O*-acetyl glucuronide. All compounds are the first report in *M. macroura* and the family Moraceae.

#### **Text S14: Identification of prenylated flavonoids:**

**Compound 34**, displayed at  $R_t$  17.83 min, was suggested to be albanin A, which was confirmed by  $[M+H]^+$  ion at  $m/z$  355 and  $MS^2$  fragment ions at  $m/z$  299, 69.<sup>14</sup> Finally, **compound 55** at  $R_t$  24.95 min was suggested to be euchrenone a7 from  $MS^1$  at  $m/z$  339  $[M-H]^+$  and  $MS^2$  fragment ion at  $m/z$  163 (100%).<sup>15</sup> These prenylated flavonoids were identified for the first time in *M. macroura*.

#### **Text S15: Identification of flavonoid derivatives**

**Compound 7** was identified as naringenin derivatives from  $MS^1$  at  $m/z$  463  $[M-H]^+$  and  $MS^2$  at  $m/z$  270.7, indicating naringenin moiety).<sup>7</sup> **Also, compound 38** that detected at at  $m/z$  475  $[M-H]^+$  together with a base peak at  $m/z$  299 was identified as Chrysoeriol-uronic acid.<sup>6</sup> Moreover, **compound 51** ( $R_t$  – 24.14 min) exhibited molecular ion peak at  $m/z$  607  $[M+H]^+$  and gave base peak fragment ion in  $MS^2$  at  $m/z$  286, indicating the presence of kaempferol aglycone moiety. Therefore, it was tentatively assigned as australisine A.<sup>16</sup> Thus, all compounds were identified for the first time in *M. macroura*.

#### **Text S16: Identification of tannin compounds**

**Compounds 27** and **28** were suggested to be gallicocatechin glycoside and epigallocatechin glycoside,<sup>2</sup> respectively, based on  $MS^1$  at  $m/z$  467  $[M-H]^+$  and  $MS^2$  fragments at  $m/z$  305 due to loss of glycosyl moiety. Thus, these compounds represent the first report in the family Moraceae.

#### **Text S17: Identification of coumarin compounds**

Coumarin compounds were detected in the plant under investigation at different retention times as in compound **2** that identified as aesculin depending upon  $MS^1$  at  $m/z$  339  $[M-H]^+$  and  $MS^2$  at  $m/z$  177, which attributed to cleavage of glycosidic linkage and loss of glycosyl moiety.<sup>2</sup> In



addition, **compound 9** that displayed MS<sup>1</sup> at  $m/z$  355 [M+H]<sup>+</sup> and MS<sup>2</sup> at  $m/z$  193 due to loss of 162 amu was identified as scopolin.<sup>17</sup> Also, **compound 33**, which detected  $m/z$  355 [M+H]<sup>+</sup> with MS<sup>2</sup> fragment ion at  $m/z$  203 (loss of side chain, 152), was identified as epoxybergamottin.<sup>18</sup> All compounds are the first report in *M. macroura*.

#### **Text S18: Identification of anthocyanin derivatives compounds:**

**Compound 12** showed a molecular ion peak at  $m/z$  449 [M+H]<sup>+</sup> with MS<sup>2</sup> fragment ion at  $m/z$  287 due to loss of glycoside; it has been suggested to be cyanidin-3-*O* glucoside.<sup>1</sup> Additionally, **compound 19** showed a molecular ion peak at  $m/z$  610 [M+H]<sup>+</sup> and characteristic MS<sup>2</sup> fragment at  $m/z$  317.5 due to loss of two molecules of rhamnose (292 amu), 256.8, 151.2, which suggested to be petunidin dirhamnoside.<sup>19</sup> Furthermore, **compound 36** which detected at  $m/z$  591 [M-H]<sup>+</sup> with MS<sup>2</sup> at  $m/z$  287 due to cyanidin moiety, was identified as cyanidin cinnamoyl glucuronide.<sup>20</sup> Also, **compound 42** that identified as malvidin diglucuronide showed MS<sup>1</sup> at  $m/z$  683 [M+H]<sup>+</sup> and MS<sup>2</sup> at  $m/z$  331 attributed to loss of two moieties of glucuronic acid (352 amu).<sup>21</sup> **Compound 44** was identified as cyanidin derivative from MS<sup>1</sup> at  $m/z$  683 [M+H]<sup>+</sup> and MS<sup>2</sup> at  $m/z$  597 (loss of 86), 435 (loss of glucose), 287.<sup>22</sup> Moreover, **compound 48** exhibited protonated molecular ion at  $m/z$  593 [M+H]<sup>+</sup> with MS<sup>2</sup> at  $m/z$  287 due to loss of rutinose, was identified as cyanidin-3-*O*-rutinoside from **Jin et al. (2017)**.<sup>1</sup> Additionally, **compound 54** was confirmed as petunidin 3-*O*-acetyl glucuronide based on MS<sup>1</sup> at  $m/z$  535 [M+H]<sup>+</sup> and MS<sup>2</sup> at  $m/z$  317 due to loss of 218 amu attributed to loss of acetyl group and glucuronic moiety (42, 176 amu), 153.<sup>23</sup> Moreover, malvidin-3-*O*-acetyl glucoside was designated for **compound 57** based on molecular ion at  $m/z$  535 [M+H]<sup>+</sup> and MS<sup>2</sup> at  $m/z$  331 due to loss of 204 amu.<sup>24</sup> In addition, **compound 58** that showed a molecular ion at  $m/z$  683 [M+H]<sup>+</sup> with MS<sup>2</sup> at  $m/z$  597 (loss of 86 malonyl moiety), 435 (loss of glucose), 287.7 was proposed to be cyanidin-3-*O*-malonyl glucoside derivative.<sup>25</sup> Also, cyanidin-3-*O*-

malonyl glucoside was suggested for **compound 59** depending on MS<sup>1</sup> at  $m/z$  535 [M+H] and MS<sup>2</sup> at  $m/z$  287. **Compound 61** concluded to be cyanidin-3-*O*-hexosyl hexoside according to MS<sup>1</sup> at  $m/z$  611 [M+H]<sup>+</sup> and MS<sup>2</sup> at  $m/z$  449 (loss of glucose).<sup>1</sup> Finally, **compound 62** showed a molecular ion peak at  $m/z$  475 [M-H]<sup>+</sup> along with MS<sup>2</sup> ions at  $m/z$  429 (loss of 46), 299.8 (loss of 176), hence identified as peonidin-3-*O*-glucuronide.<sup>26</sup> All anthocyanin compounds identified for the first time in *M. macroura*.

#### **Text S19: Identification of fatty acids:**

Cerotic acid (hexacosanoic acid) was designated for compound **21** according to protonated molecular ion at  $m/z$  397 [M+H]<sup>+</sup> and MS<sup>2</sup> at  $m/z$  351 [M<sup>+</sup>-COOH].<sup>27</sup> Cerotic acid was isolated as a pure compound from the plant species under investigation (**Compound 4**). However, compound **32** was identified as nonatriacontanoic acid which displayed MS<sup>1</sup> at  $m/z$  579 [M+H]<sup>+</sup> and it was isolated as a pure compound in the current work (**Compound 2**).<sup>28</sup> Moreover, compound **35** was suggested to be hydroxy octadecatrienoic acid based on MS<sup>1</sup> at  $m/z$  293 [M-H]<sup>+</sup> and MS<sup>2</sup> at  $m/z$  220.8 [M<sup>+</sup>-CH<sub>2</sub>-CH<sub>2</sub>-COOH].<sup>29</sup> Furthermore, compound **43** was identified as melissic acid (triacontanoic acid) depending upon MS<sup>1</sup> at  $m/z$  451 [M-H]<sup>+</sup> and MS<sup>2</sup> fragmentation at  $m/z$  249.8, 390.5 [M<sup>+</sup>-COOH-CH<sub>3</sub>], 406.7 [M<sup>+</sup>-COOH], 435.1 [M<sup>+</sup>-H-CH<sub>3</sub>],<sup>30</sup> and it was isolated as a pure compound in our work (**Compound 3**). **Compound 45** showed a molecular ion peak at  $m/z$  255 [M-H]<sup>+</sup> which suggested to be palmitic acid,<sup>28</sup> and it was isolated as a pure compound in the current work (**Compound 5**). Oleic acid was designated for compound **46** which showed a molecular ion peak at  $m/z$  281 [M-H]<sup>+</sup>.<sup>28</sup> Finally, compound **52** was proposed to be octadecanoic acid according to MS<sup>1</sup> at  $m/z$  283 [M-H]<sup>+</sup> and MS<sup>2</sup> at  $m/z$  239 [M-H-COO]. All compounds identified for the first time in *M. macroura*. Nonatriacontanoic, hydroxyl octadecatrienoic and melissic acids are first report in Moraceae family.

### **Text S20: Identification of fatty acids derivatives**

**Compound 41** suggested to be palmitic acid ester based on MS<sup>1</sup> at  $m/z$  475 [M-H]<sup>+</sup> besides MS<sup>2</sup> fragment ion at  $m/z$  255.<sup>28</sup> Also, compound **50** was identified as oleic acid ester which displayed molecular ion at  $m/z$  395 [M-H]<sup>+</sup> and MS<sup>2</sup> at  $m/z$  281.<sup>28</sup> All these fatty acid esters are identified for the first time in *M. macroura*.

### **Identification of steroid and triterpenoid compounds**

**Compound 40** that exhibited a molecular ion peak at  $m/z$  381 [M+H]<sup>-</sup> with distinctive fragment ions at  $m/z$  318, 163, 139, 71, 69, was identified as brasicasteol.<sup>31</sup> Also, **compound 56** which showed a molecular ion at  $m/z$  414 [M+H]<sup>-</sup> along with characteristic fragment ion at  $m/z$  254.9 was identified as  $\beta$ -sitosterol. Moreover, 24-Methylene ergosta-5-en-3 $\beta$ -Ol was designated as compound **63** which showed MS<sup>1</sup> at  $m/z$  398 and MS<sup>2</sup> at  $m/z$  381 [M-H<sub>2</sub>O+H]<sup>+</sup>, 281 [M-C<sub>7</sub>H<sub>13</sub>-H<sub>2</sub>O-2H]<sup>+</sup>.<sup>31</sup> Also, compound **64** showed a molecular ion peak at  $m/z$  455 [M-H]<sup>-</sup> which suggested to be oleanolic acid.<sup>28</sup> All compounds identified for the first time in *M. macroura*. Cholesterol, brasicasteol and 24-Methylene ergosta-5-en-3 $\beta$ -Ol were reported for the first time in family Moraceae.

### **Text S21: Identification of steroid and triterpenoid derivatives**

$\beta$ -sitosterol-3-*O*-D-glucoside,<sup>32</sup> was assigned for compound **30**, based on deprotonated molecular ion at  $m/z$  575 [M-H]<sup>-</sup> and it was isolated as a pure compound in this work (**Compound 10**). Finally compounds **31** and **60** were identified as lupeol acetate and lupeol palmitate,<sup>33</sup> based on MS<sup>1</sup> at  $m/z$  467 [M-H]<sup>-</sup> and 663 [M+H]<sup>-</sup> and both compounds were isolated in pure form during the current study and designated as (**Compound 7**) and (**Compound 6**), respectively. All compounds identified for first time in *M. macroura*.

### **Text S22: Identification of hydrocarbons and sugars**

**Compound 49** was identified as pentacos-7-ene, <sup>34</sup>from MS<sup>1</sup> at *m/z* 349 [M-H]<sup>-</sup> and it was isolated as a pure compound in the current work and is identified for the first time in family Moraceae.

In conclusion, the major compounds in DCM-L fraction are cyanidin-3-*O*-malonyl glucoside and its derivatives, cyanidin rutinoside, chlorogenic acid, quercetin-*O*-glucoside, kaempferol-*O*-glucoside, 24-Methylene-ergosta-5-en-3 $\beta$ -Ol, isorhamnetin-3-*O*-acetyl glucuronide, bis (2-ethyl hexyl) phthalate and morin-*O*- $\beta$ -glucoside. On the other side, cyanidin-3-*O*-malonyl glucoside, melissic acid, phloracetophenone-4-*O*-glucoside, 24-methylene-ergosta-5-en-3 $\beta$ -Ol, cerotic acid, and bis (2-ethyl hexyl) phthalate are the most abundant constituents in DCM-S fraction. The major flavonoids that present in the DCM -L and absent in the DCM-S are quercetin-*O*-glucoside, kaempferol-*O*-glucoside, morin-*O*- $\beta$ -glucoside, naringenin derivatives, apigenin-8-C-glucoside, luteolin-7-*O*-glucoside, quercetin-8-C-rhamnoside, and quercetin-3-*O*- $\beta$ -rhamnoside. These results agree with **Jin et al. (2015)**, <sup>35</sup>and could give insights into the possible potentials of these fractions as an anti-depressant and cardioprotective against ISO induced post-MI depression rat model.

## References

1. Q. Jin, J.L. Yang, L. Mab, D. Wen, F. Chen, J. Lia, Identification of polyphenols in mulberry (genus *Morus*) cultivars by liquid chromatography with time-of-flight mass spectrometer, *J Food Compost Anal.*, 2017, **63**, 55–64.
2. M.M. Natić, D. Dabic, C.A. Papetti, M.M.F. Aksic, V. Ognjanov, M. Ljubojevic, Z.L. Tesic, Analysis and characterization of phytochemicals in mulberry (*Morus alba* L.) fruits grown in Vojvodina, North Serbia, *Food Chem.*, 2015, **171**, 128-136.
3. Y. Wang, M. Yang, X. Wang, T. Li, L. Kong, Bioactive metabolites from the endophytic fungus *Alternaria alternata*, *Fitoterapia*, 2014, **99**, 153–158.
4. H. Wei, J.J. Zhu, X.Q. Liu, W.H. Feng, Z.M. Wang, L.H. Yan, Review of bioactive compounds from root barks of *Morus* plants (Sang-Bai-Pi) and their pharmacological effects, *Cogent Chem.*, 2016, **2**, 1212320.

5. D. Hamdan, R.A. El-Shiekh, M. El-Sayed, H.M. Khalil, M. Mousa, A. Al-Gendy, A. El-Shazly, Phytochemical characterization and anti-inflammatory potential of Egyptian *Murcott mandarin* cultivar waste (stem, leaves and peel), *Food Funct.*, 2020, **11**, 8214–8236.
6. A. Plazonić, F. Bucar, Z. Males, A. Mornar, B. Nigovic, N. Kujundzic, Identification and quantification of flavonoids and phenolic acids in burr parsley (*Caucalis platycarpos* L.), using high-performance liquid chromatography with diode array detection and electrospray ionization mass spectrometry, *Molecules*, 2009, **14**, 2466-2490.
7. A. Brito, J.E. Ramirez, C. Areche, B. Sepulveda, M.J. Simirgiotis, HPLC-UV-MS profiles of phenolic compounds and antioxidant activity of fruits from three citrus species consumed in Northern Chile, *Molecules*, 2014, **19**, 17400-17421.
8. G. Jang, H. Kim, M. Lee, S. Jeong, R. Bak, D. Lee, J. Kim, Characterization and quantification of flavonoid glycosides in the Prunus genus by UPLC-DADQTOF/MS, *Saudi J. Biol. Sci.*, 2016, **25**, 1-10.
9. A. Alberti-Der, LC-ESI-MS/MS methods in profiling of flavonoid glycosides and phenolic acids in traditional medicinal plants: *Sempervivum tectorum* L. and *Corylus avellana* L, Ph. D. Dissertation , Semmelweis University, 2013.
10. R.M. Ibrahim, A. El-Halawany, D. Saleh, E. El Naggar, A. El-Shabrawy, S. El-Hawary, HPLC-DAD-MS/MS profiling of phenolics from *Securigera securidaca* flowers and its anti-hyperglycemic and anti-hyperlipidemic activities, *Rev. bras. farmacogn.*, 2015, **25**, 134-141.
11. J. Yang, X. Liu, Q. Zhang, Q. Jin, J. Li, Phenolic Profiles, Antioxidant Activities, and Neuroprotective Properties of Mulberry (*Morus atropurpurea* Roxb.) Fruit Extracts from Different Ripening Stages, *J. Food Sci.*, 2016, **81**, C2439- C2446.
12. G. Le Gall, M.S. DuPont, F.A. Mellon, A.L. Davis, G.J. Collins, M.E. Verhoeven, Colquhoun IJ. Characterization and content of flavonoid glycosides in genetically modified tomato (*Lycopersicon esculentum*) fruits, *J. Agric. Food Chem.*, 2003, **51**, 2438-46.
13. S.H. Im, Z. Wang, S.S. Lim, O.H. Lee, I.J. Kang, Bioactivity-guided Isolation and identification of anti-adipogenic compounds from *Sanguisorba officinalis*, *Pharm. Biol.*, 2017, **55**, 2057-2064.
14. T.K. Lim, Edible Medicinal and Non-Medicinal Plants. Volume 4, Fruits: Springer Dordrecht Heidelberg London New York, 1- 436, *Trends Food Sci Technol.*, 2012, **19**, 505-512.
15. F. Ferlinahayati, Y.M. Syah, L.D. Juliawaty, E.H. Hakim, Flavanones from the wood of *Morus nigra* with cytotoxic activity, *Indones. J. Chem.*, 2013, **131**, 205-208.
16. Q.J. Zhang, Y.B. Tang, R.Y. Chen, D.Q. Yu, Three New Cytotoxic Diels–Alder-Type Adducts from *Morus australis*, *Chem. Biodivers.*, 2007, **4**, 1533-1540.

17. K. Doi, T. Kojima, M. Makino, Y. Kimura, Y. Fujimoto, Studies on the constituents of the leaves of *Morus alba* L, *Chem. Pharm. Bull.*, 2001, **49**, 151-153.
18. J.A. Manthey, HPLC-MS analysis of coumarins and furanocoumarin dimers in immature grape fruit, *Proc. Fla. State Hort. Soc.*, 2005, **118**, 429-436.
19. M.J. Simirgiotis, J. Bórquez, G. Schmeda-Hirschmann, Antioxidant capacity, polyphenolic content and tandem HPLC–DAD–ESI/MS profiling of phenolic compounds from the South American berries *Luma apiculata* and *L. chequén*, *Food Chem.*, 2013, **139**, 289-299.
20. C.D. Kay, G. Mazza, B.J. Holub, J. Wang, Anthocyanin metabolites in human urine and serum, *Br. J. Nutr.*, 2004, **91**, 933-942.
21. A. Decendit, M. Mamani-Matsuda, V. Aumont, P. Waffo-Teguo, D. Moynet, K. Boniface, J.M. Mérillon, Malvidin-3-O- $\beta$ -glucoside, major grape anthocyanin inhibits human macrophage-derived inflammatory mediators and decreases clinical scores in arthritic rats, *Biochem. Pharmacol.*, 2013, **86**, 1461-1467.
22. N. Hassimotto, M. Genovese, F. Lajolo, Identification and characterisation of anthocyanins from wild mulberry (*Morus nigra* L.) growing in Brazil, *Food Sci Technol Int.*, 2007, **13**, 17-25.
23. H. Zhang, Z. Ma, X. Luo, X. Li, Effects of mulberry fruit (*Morus alba* L.) consumption on health outcomes: A mini-review, *Antioxidants*, 2018, **7**, 69.
24. A.S. Frey, LC/MS method development for the separation of anthocyanins and anthocyanin-derived pigments in red wines (Doctoral dissertation, Lincoln University), 2015, 1-91.
25. K. Schütz, M. Persike, R. Carle, A. Schieber, Characterization and quantification of anthocyanins in selected artichoke (*Cynara scolymus* L.) cultivars by HPLC–DAD–ESI–MSn, *Anal. Bioanal. Chem.*, 2006, **384**, 1511-1517.
26. J.M. Cooney, D.J. Jensen, T.K. McGhie, LC-MS identification of anthocyanins in boysen berry extract and anthocyanin metabolites in human urine following dosing, *J. Sci. Food Agric.*, 2004, **84**, 237-245.
27. Z.T. Murathan, M. Zarifikhosroshahi, N.E. Kafkas, Determination of fatty acids and volatile compounds in fruits of rosehip (*Rosa* L.) species by HS-SPME/GC-MS and Im-SPME/GC-MS techniques, *Turk J Agric For.*, 2016, **40**, 269-279.
28. A. Ali, M. Jameel, M. Ali, Fatty acids analysis of *Ficus religiosa* stem bark by Gas Chromatography-Mass spectrometry, *IJAPMBS.*, 2017, **112**, 1-6.
29. N.Y. Yang, Y.F. Yang, K. Li, Analysis of Hydroxy Fatty Acids from the Pollen of *Brassica campestris* L. var. *oleifera* DC. by UPLC-MS/MS, *Pharmaceutics*, 2012, **2013**, 847-852.

30. M. Jameel, A. Ali, M. Ali, Identification of new compounds from *Fumariaparviflora* Lam., *J App Pharm Sci.*, 2017, **7**, 053-060.
31. S. Panawan, C. Watcharapong, M. Sugunya L. Suwaporn, T. Somsuda L. Vijittra, Structures of phytosterols and triterpenoids with potential anti-cancer activity in bran of black non-glutinous rice, *Nutrients*, 2015, **7**, 1672-1687.
32. P. Tania, H.K. Kar, Isolation and Characterization of  $\beta$ -sitosterol-3-O- $\beta$ -D-glucoside from the Extract of the Flowers of *Viola odorata*, *J. Pharm. Res. Int.*, 2017, **16**, 1-8.
33. C.G. Magalhães, L.P. Duarte, W.D. Mussel, A.L. Ruiz, L. Shiozawa, J.E. Carvalho, S.A.Vieira Filho, Lupeol and its ester: NMR, powder XRD data and in vitro evaluation of cancer cell growth, *Braz. J. Pharm. Sci.*, 2017, **53**, 1-10.
34. J. Huang, R. Tang, H. Wu, X. Wang, GC-MS Analysis of Essential Oil from the Flowers of *Musa basjoo*, *Chem. Nat. Compd.*, 2016, **52**, 334-335.
35. Q. Jin, J. Yang, L. Ma, J. Cai, J. Li, Comparison of Polyphenol Profile and Inhibitory Activities Against Oxidation and  $\alpha$ -Glucosidase in Mulberry (Genus *Morus*) Cultivars from China, *J. Food Sci.*, 2015, **80**, 2440-2451.

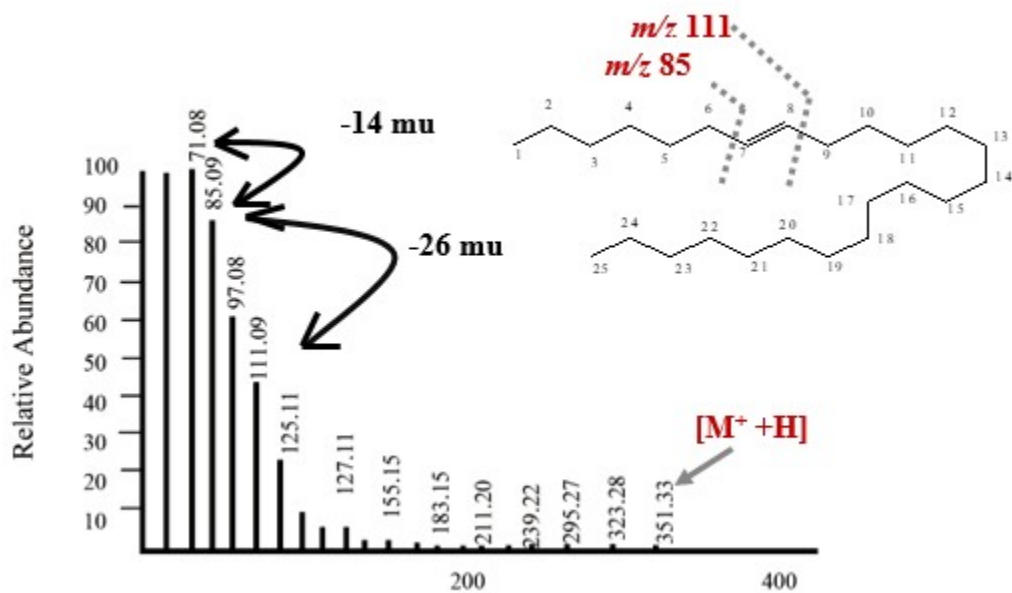

Figure (S1): EI-MS spectrum of compound "1".

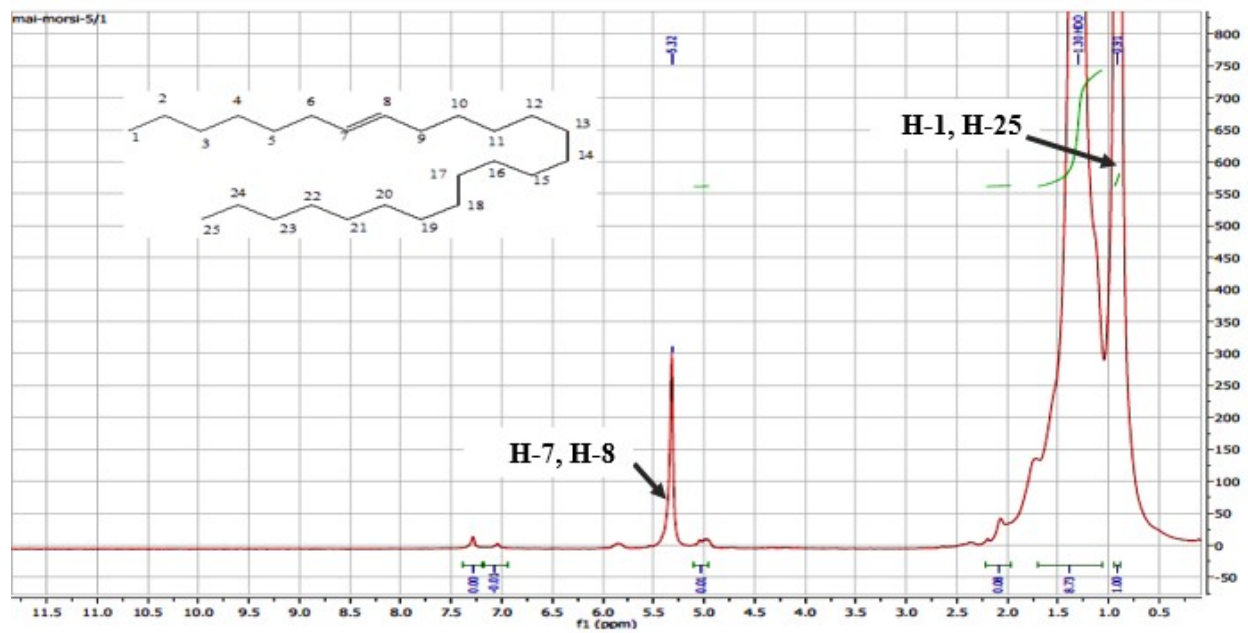

Figure (S2):  $^1\text{H-NMR}$  spectrum of compound "1".



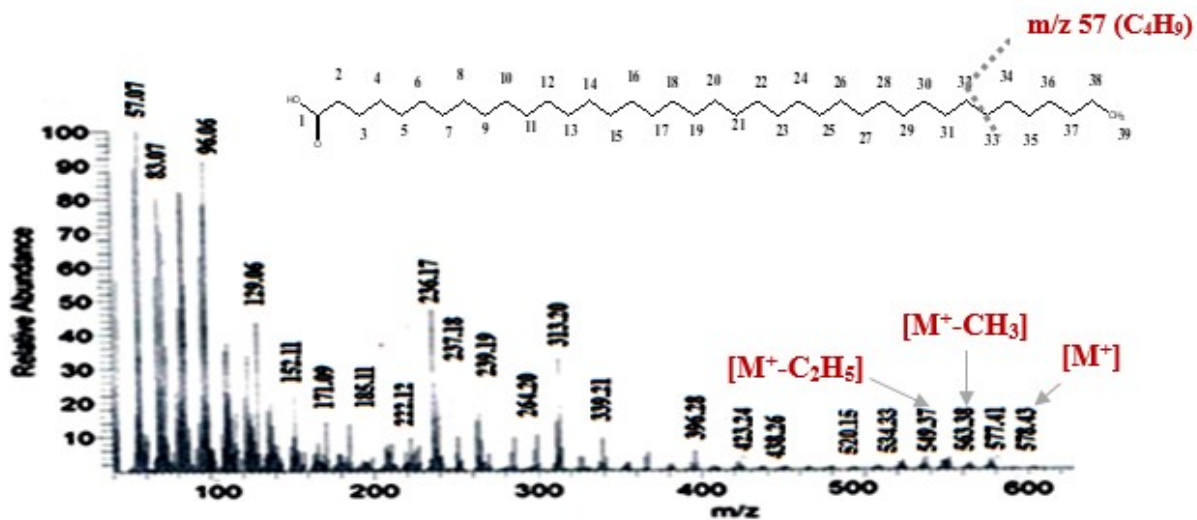

Figure (S3): EI-MS spectrum of compound "2".

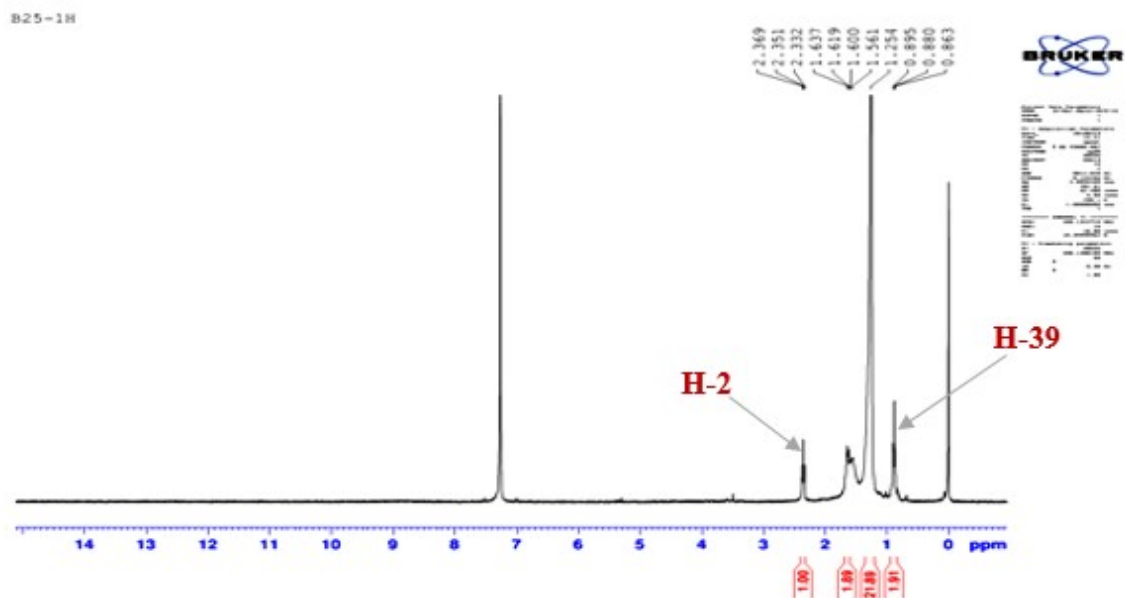

Figure (S4):  $^1H$ -NMR spectrum of compound "2".

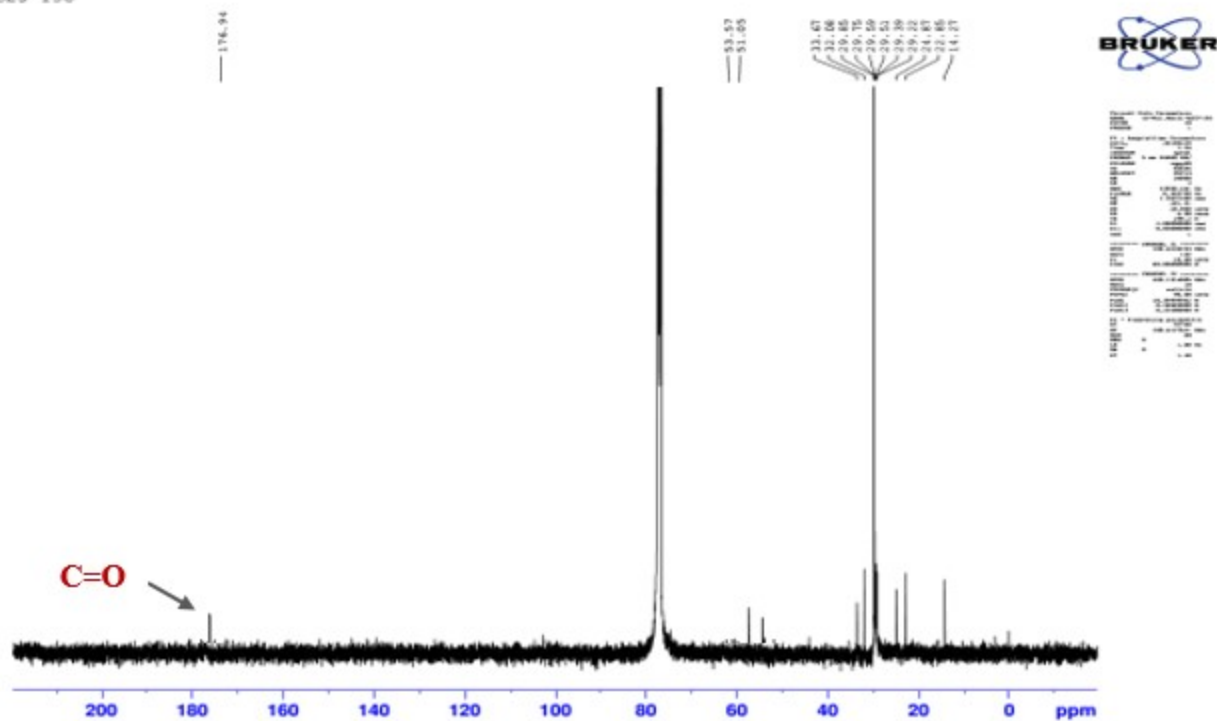

Figure (S5):  $^{13}\text{C}$ -NMR spectrum of compound “2”.

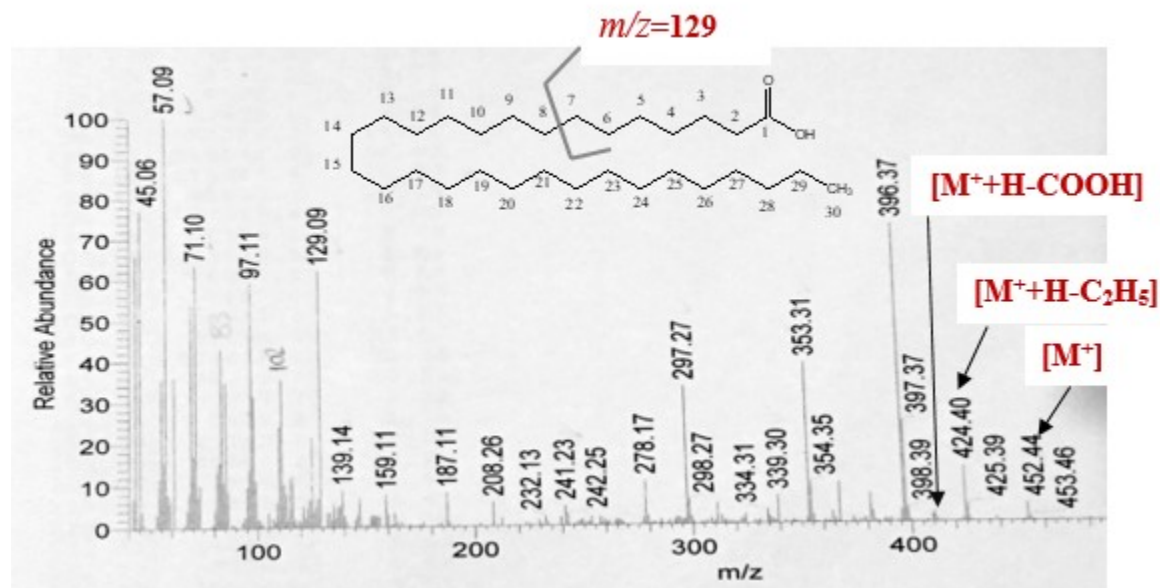

Figure (S6): EI-MS spectrum of compound “3”.

19-1H

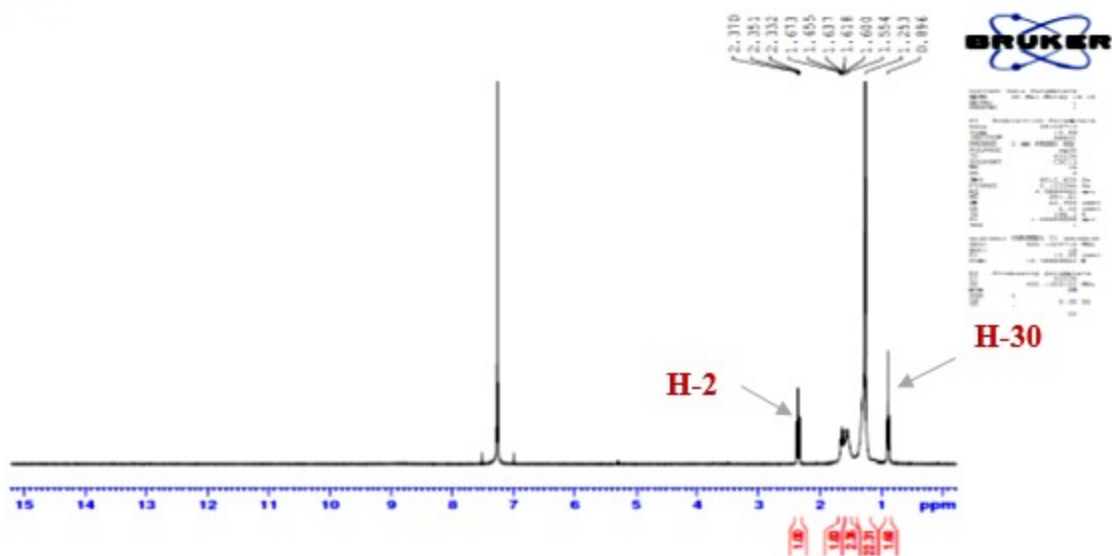

re (S7): <sup>1</sup>H-NMR spectrum of compound "3".

Figur

19-13C

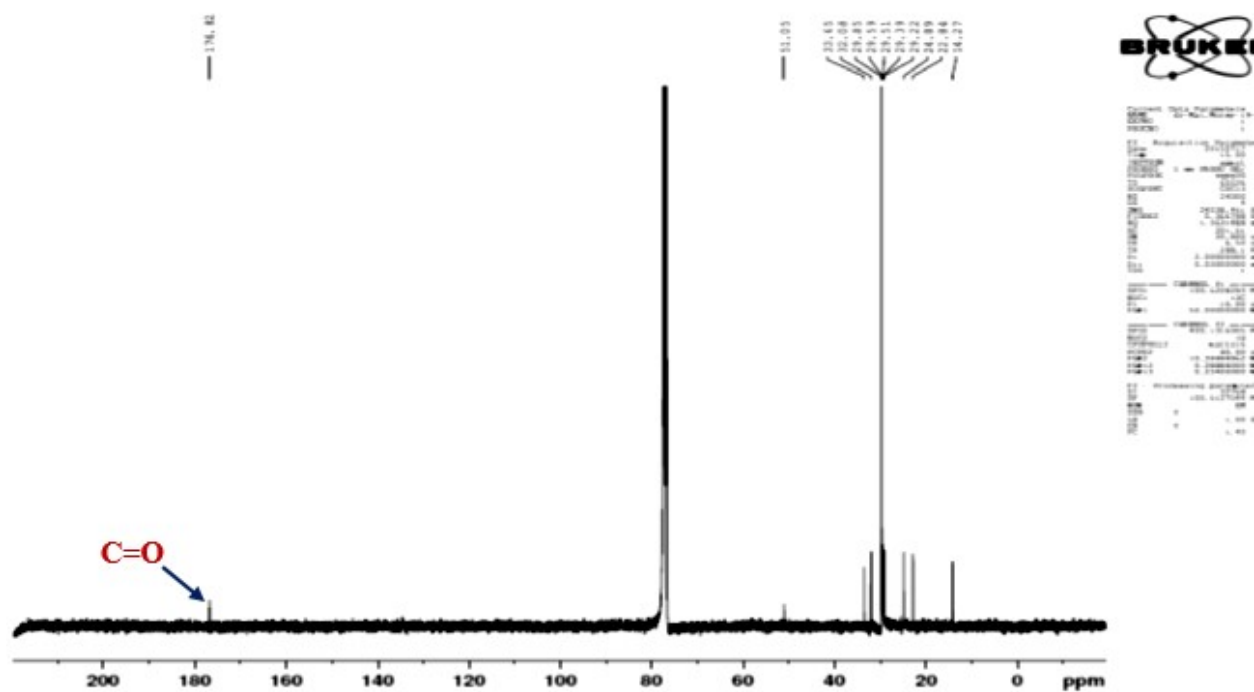

Figure (S8): <sup>13</sup>C-NMR spectrum of compound "3".

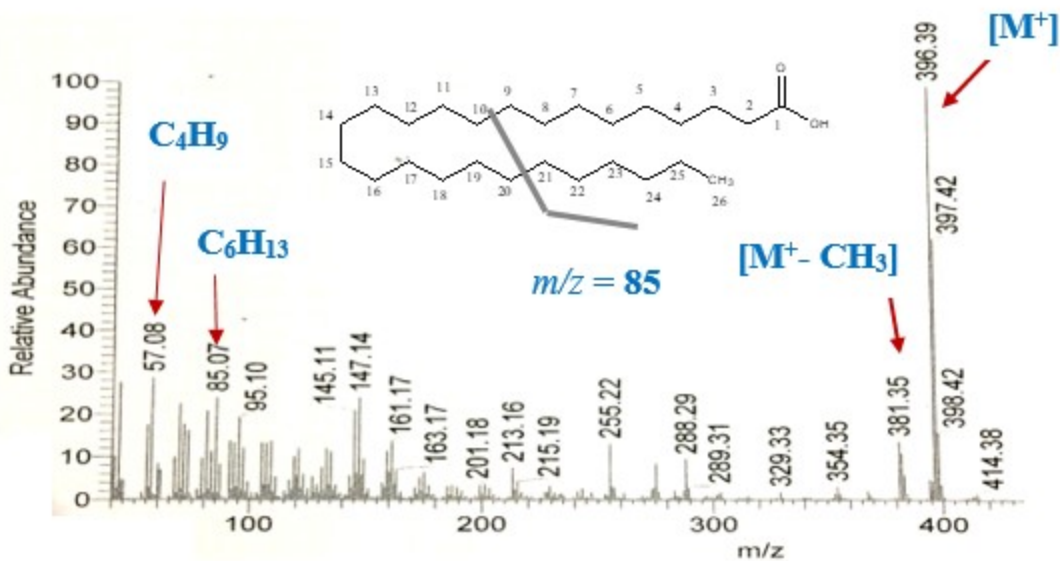

Figure (S9): EI-MS spectrum of compound "4".

24-1B

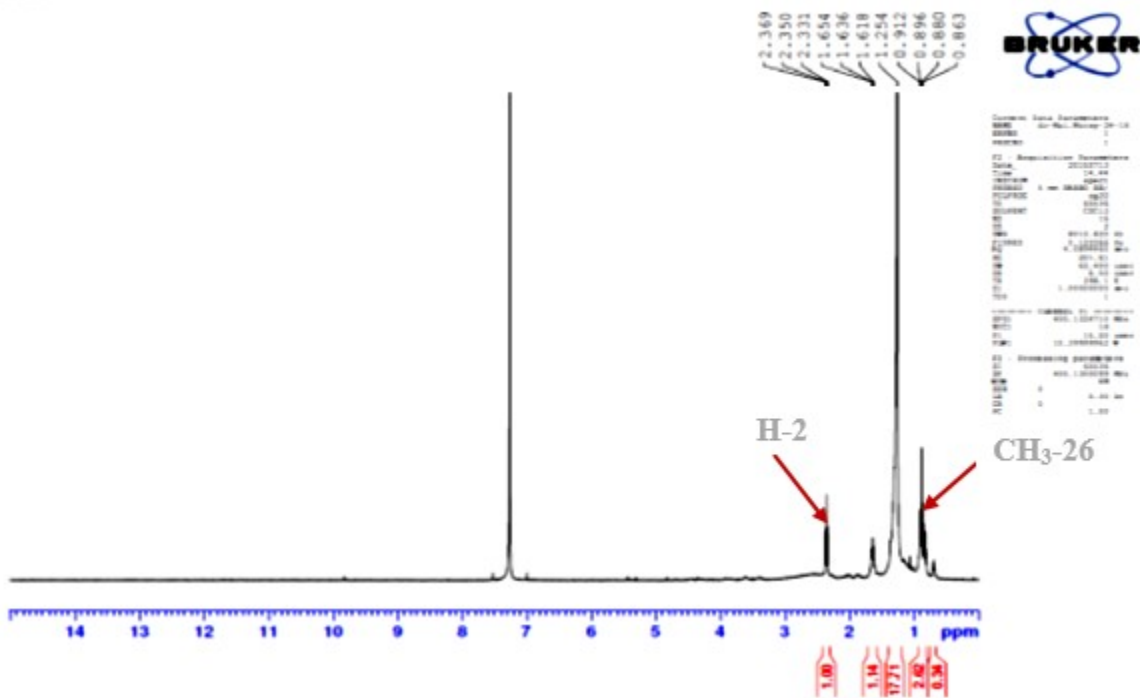

Figure (S10): <sup>1</sup>H-NMR spectrum of compound "4".

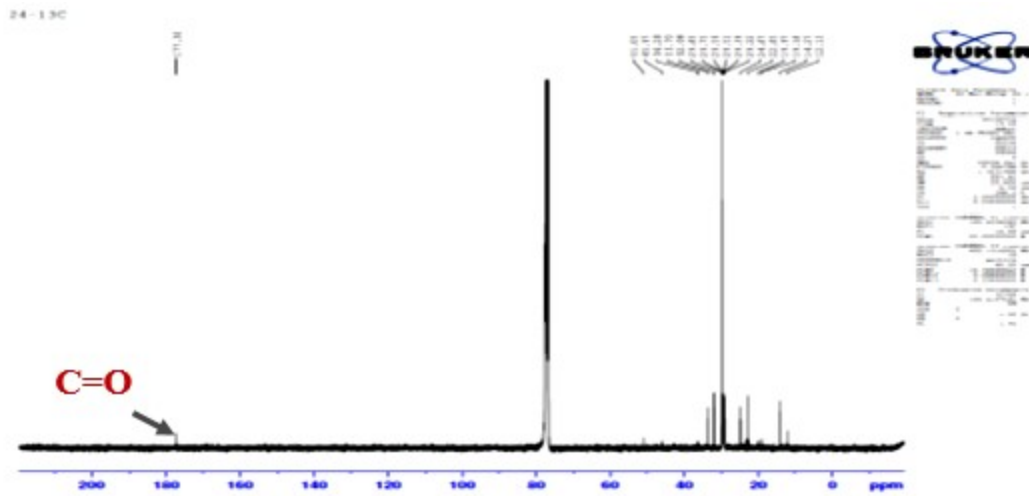

**Figure (S11):** <sup>13</sup>C-NMR spectrum of compound “4”.

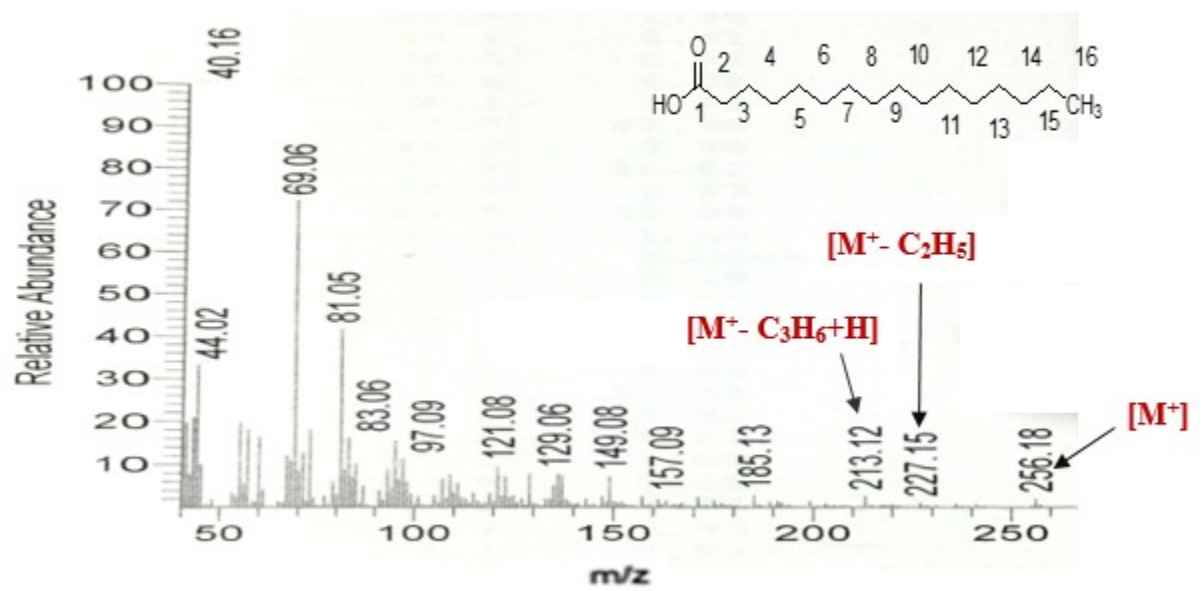

**Figure (S12):** EI-MS spectrum of compound “5”.

B23-1H

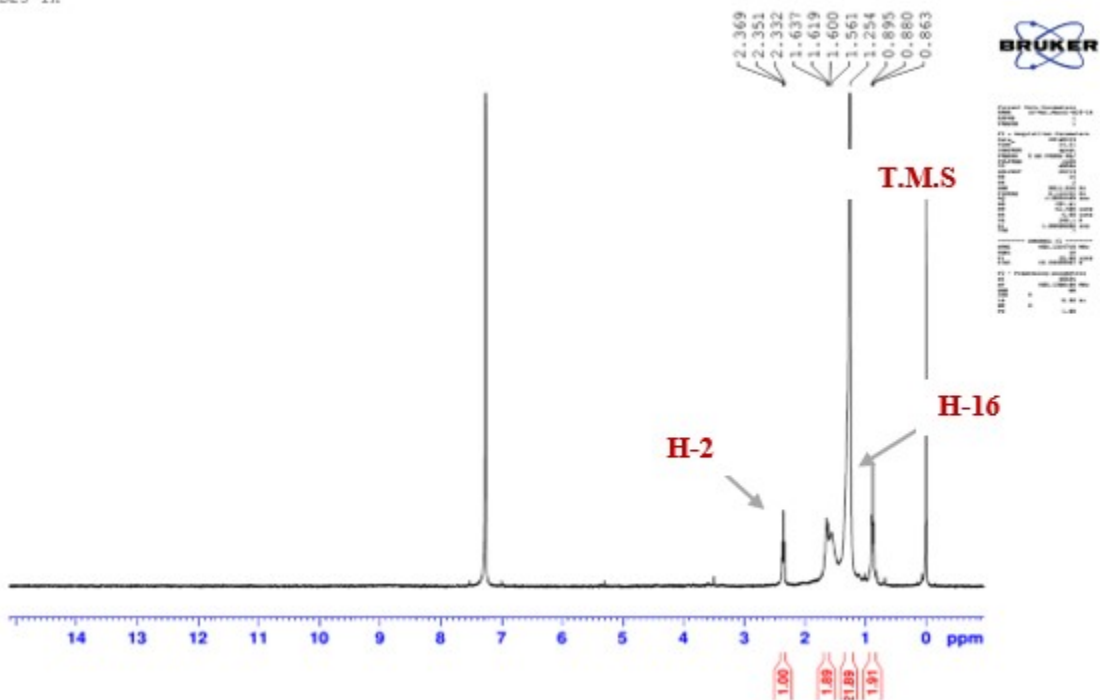

Figure (S13): <sup>1</sup>H-NMR spectrum of compound "5".

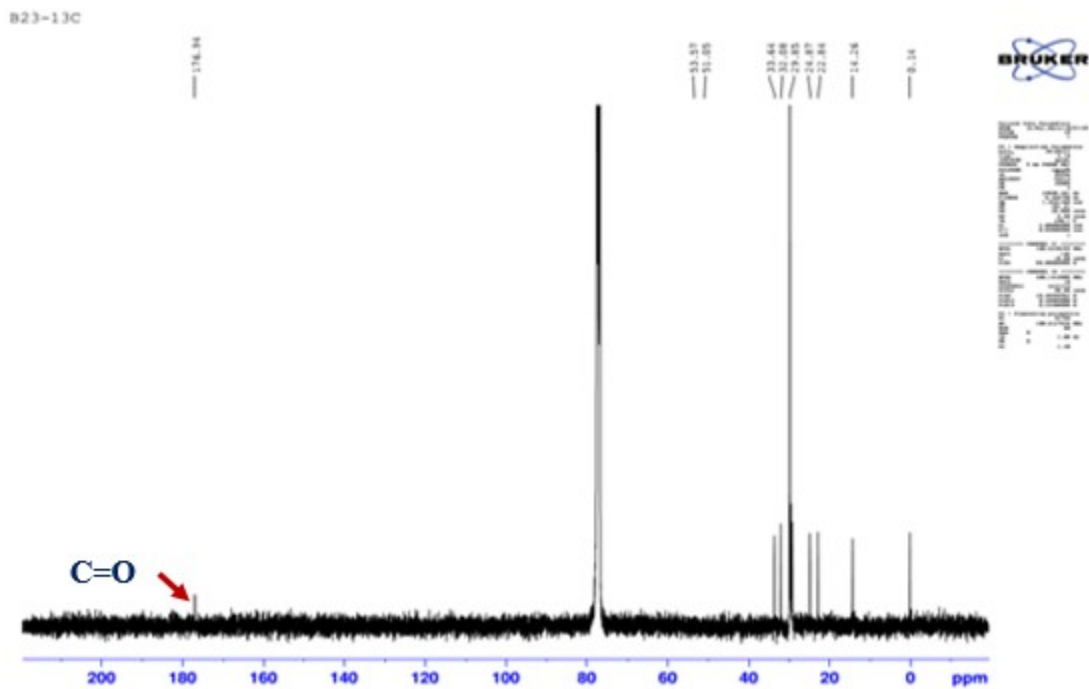

Figure (S14): <sup>13</sup>C-NMR spectrum of compound "5".

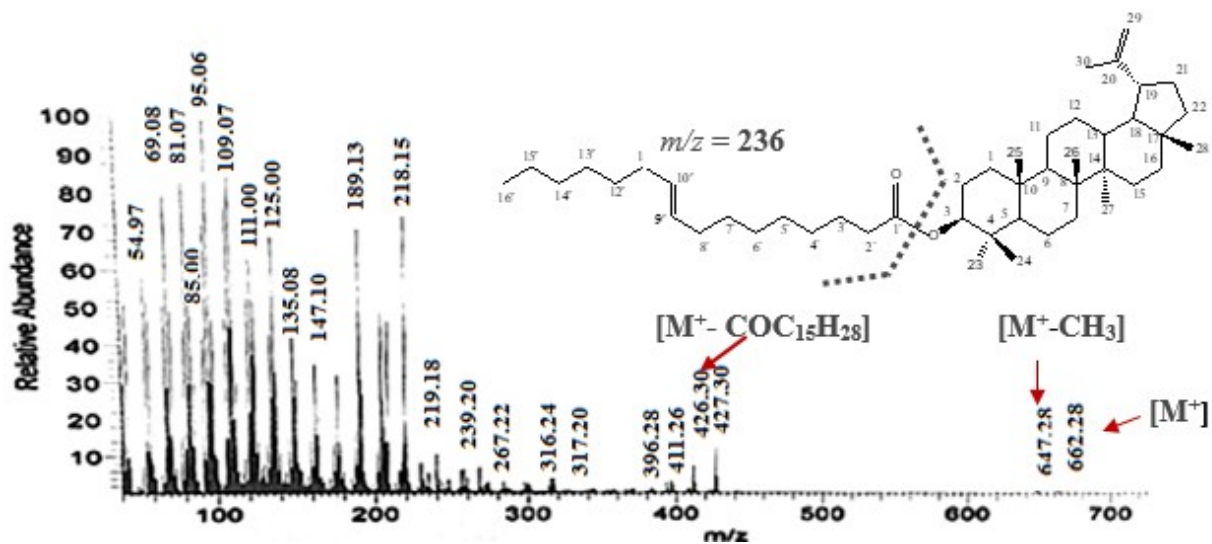

Figure (S15): EI-MS spectrum of compound "6".

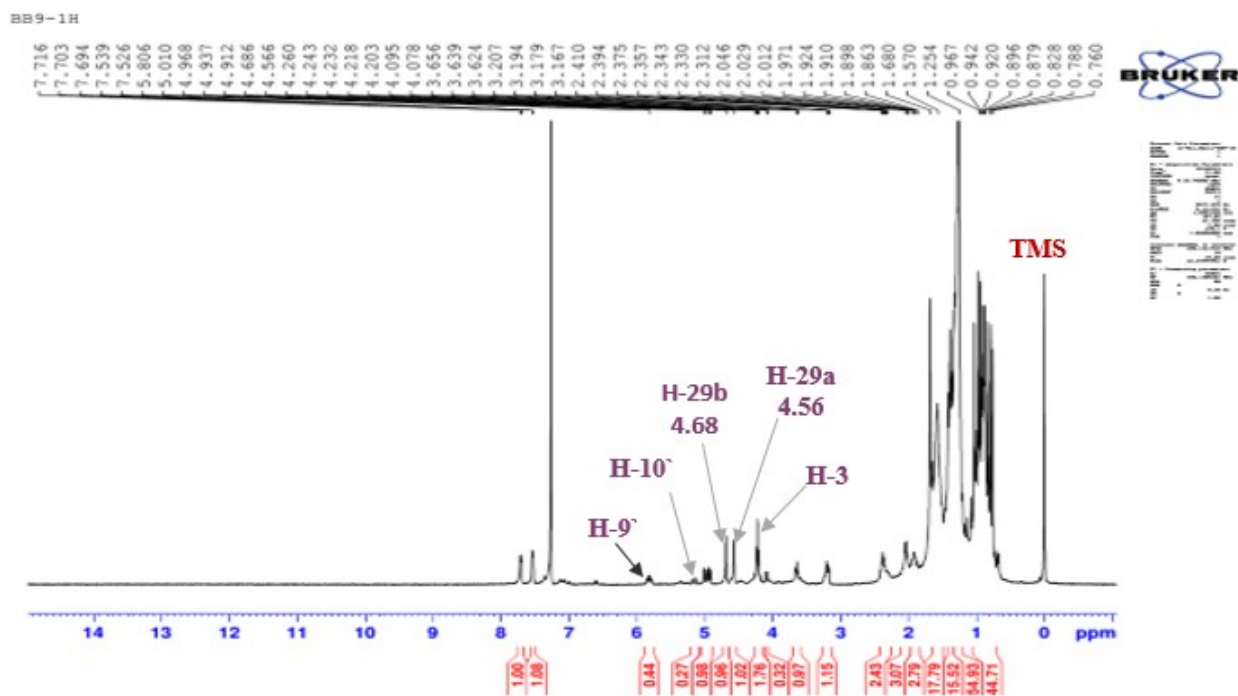

Figure (S16):  $^1H$ -NMR spectrum of compound "6".

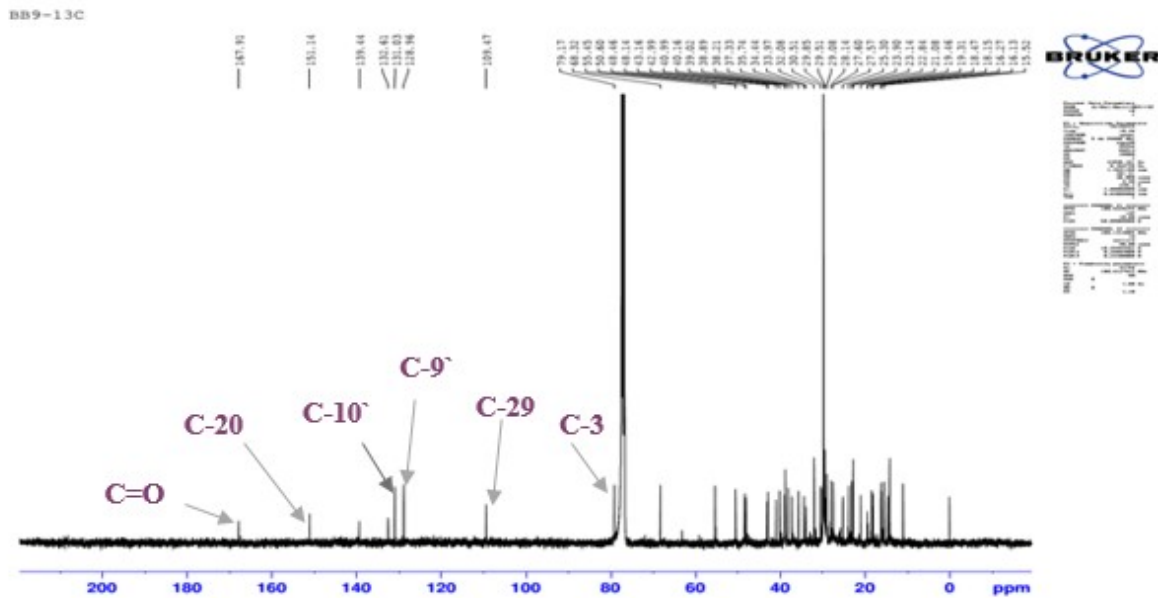

Figure (S17): <sup>13</sup>C-NMR spectrum of compound "6".

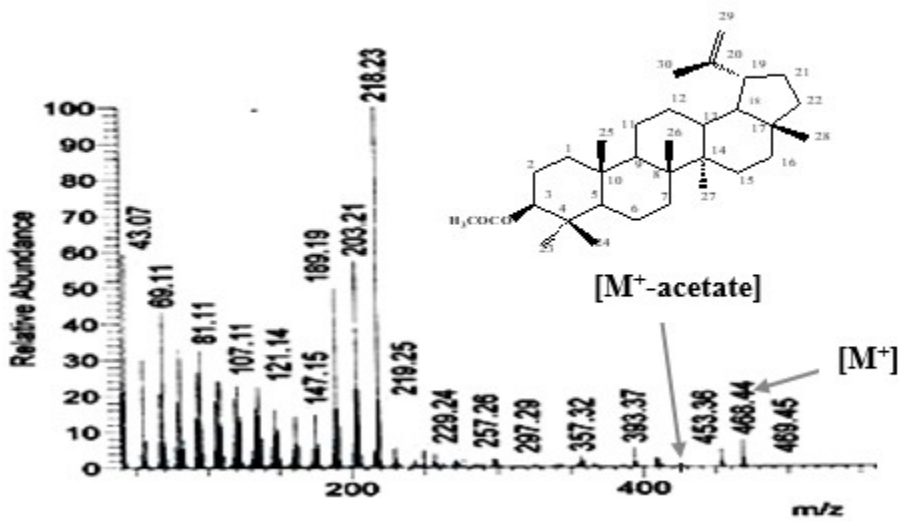

Figure (S18): EI-MS spectrum of compound "7".



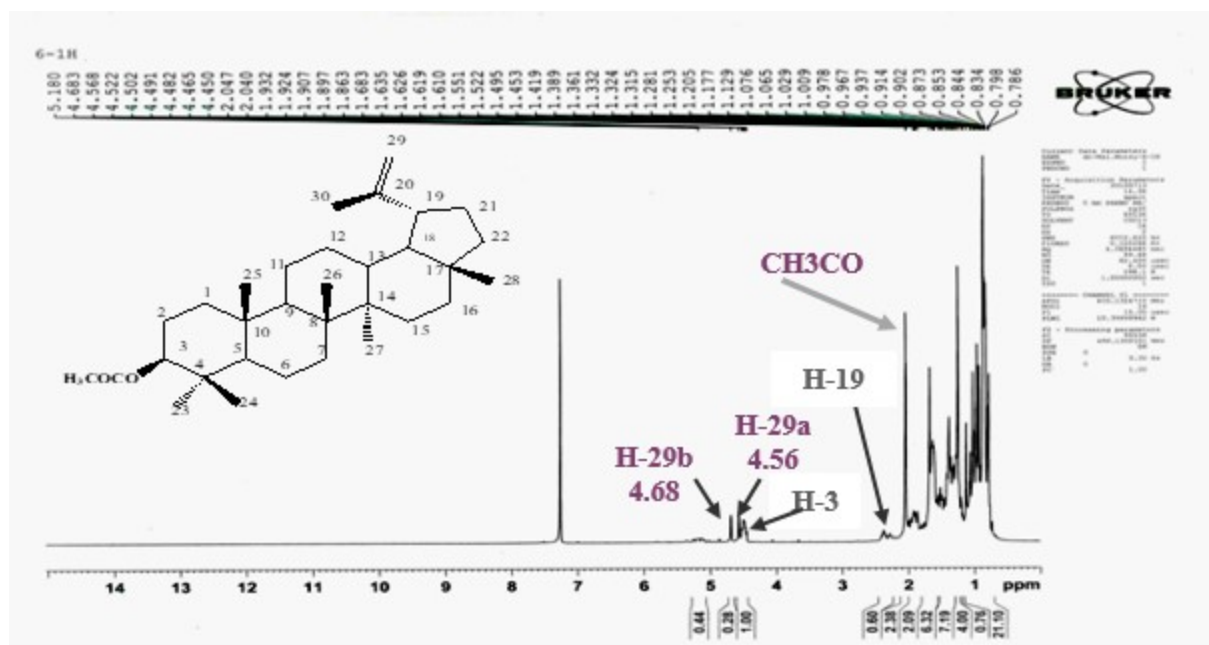

Figure (S19):  $^1\text{H-NMR}$  spectrum of compound "7".

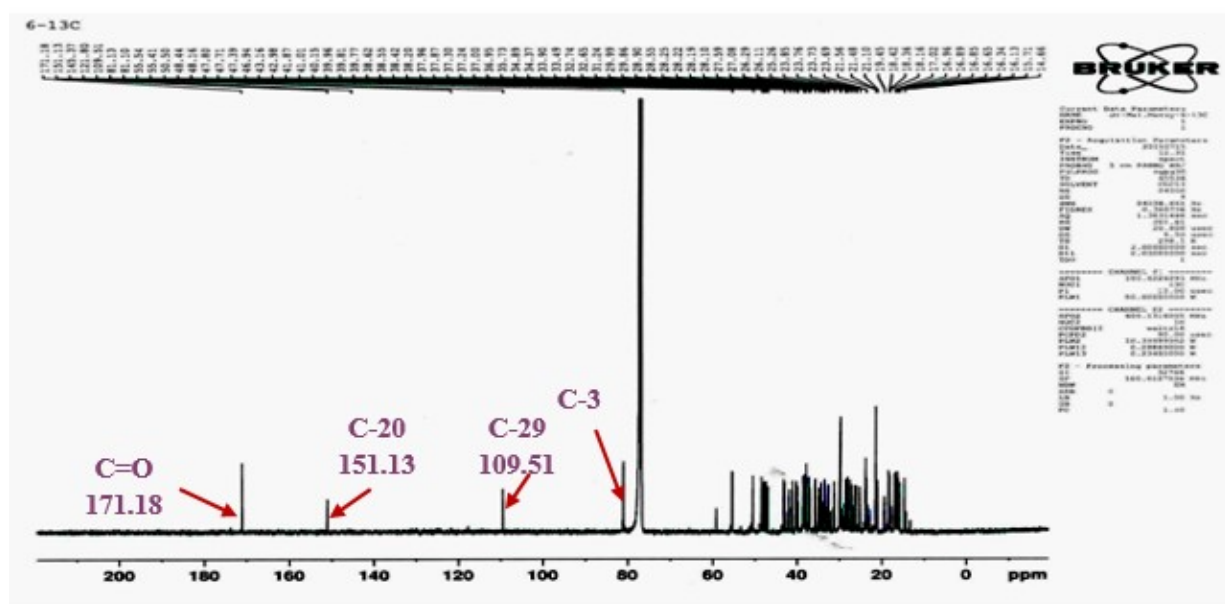

Figure (S20):  $^{13}\text{C-NMR}$  spectrum of compound "7".

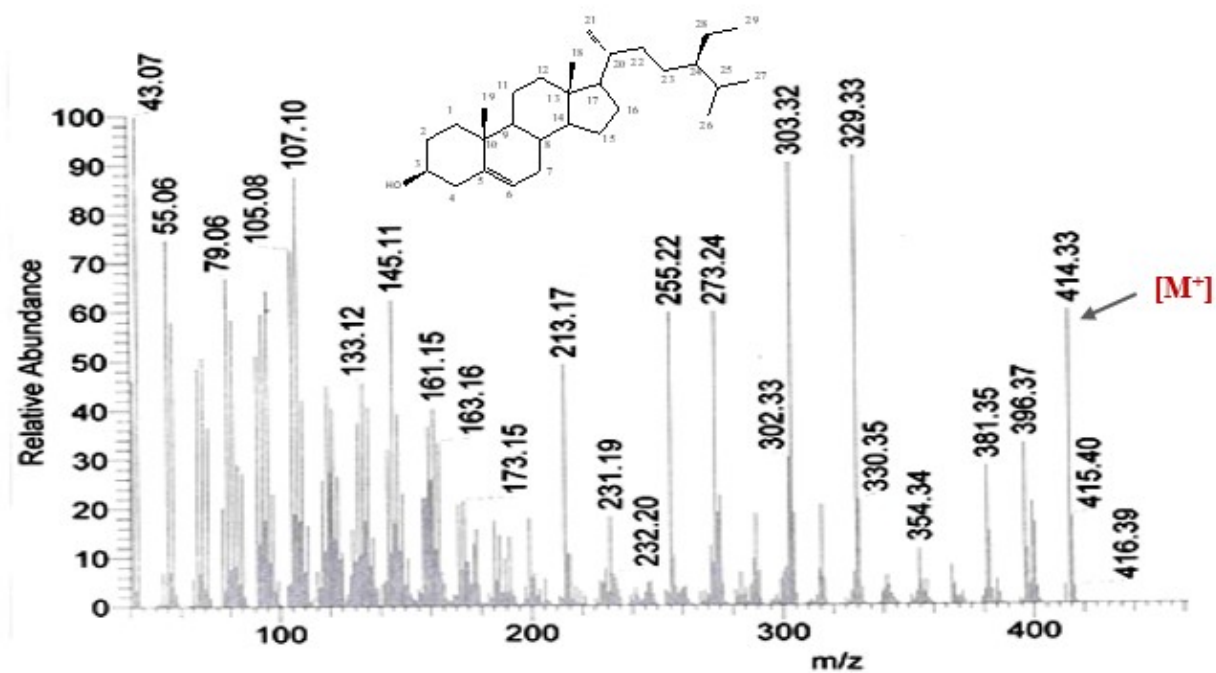

Figure (S21): EI-MS spectrum of compound "8".

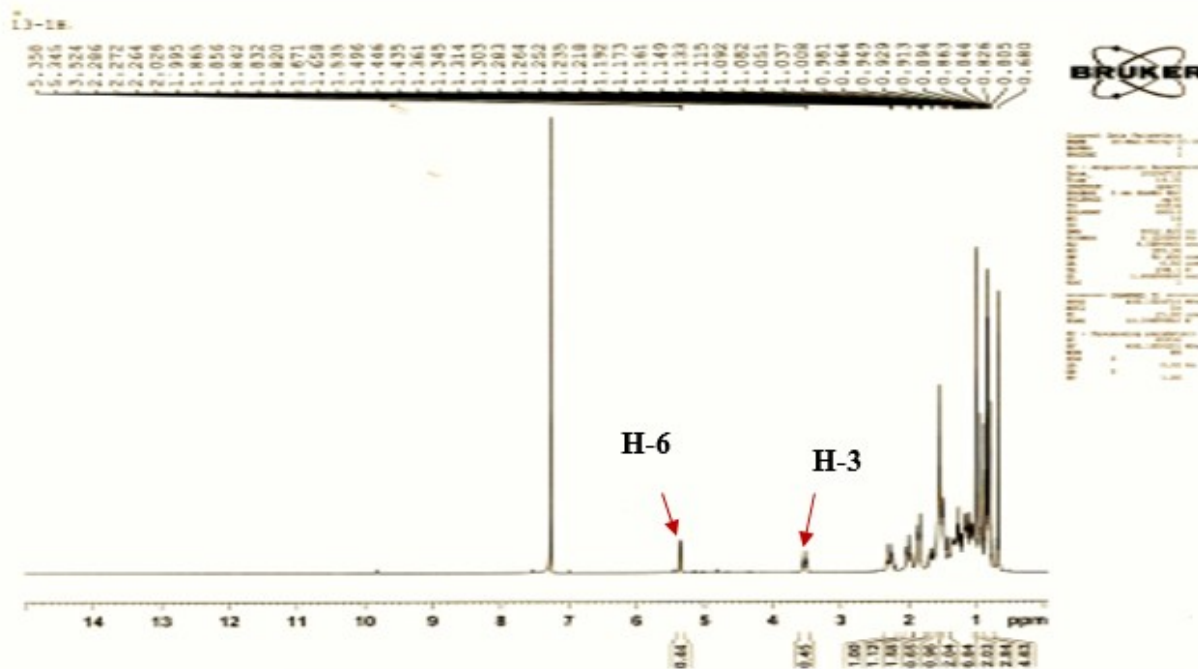

Figure (S22): <sup>1</sup>H-NMR spectrum of compound "8".

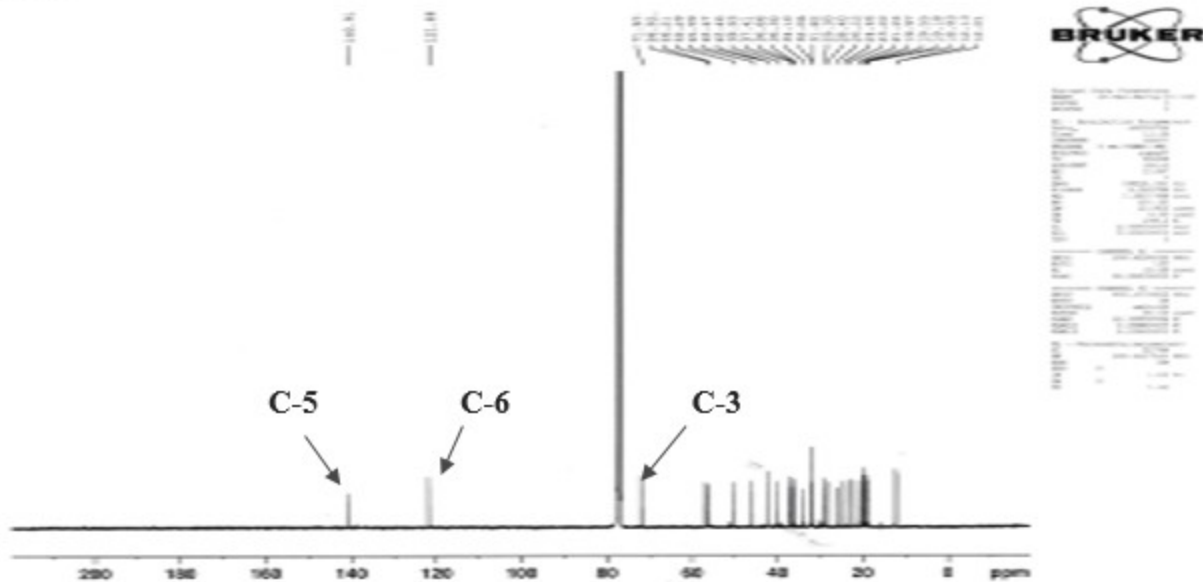

Figure (S23): <sup>13</sup>C-NMR spectrum of compound "8".

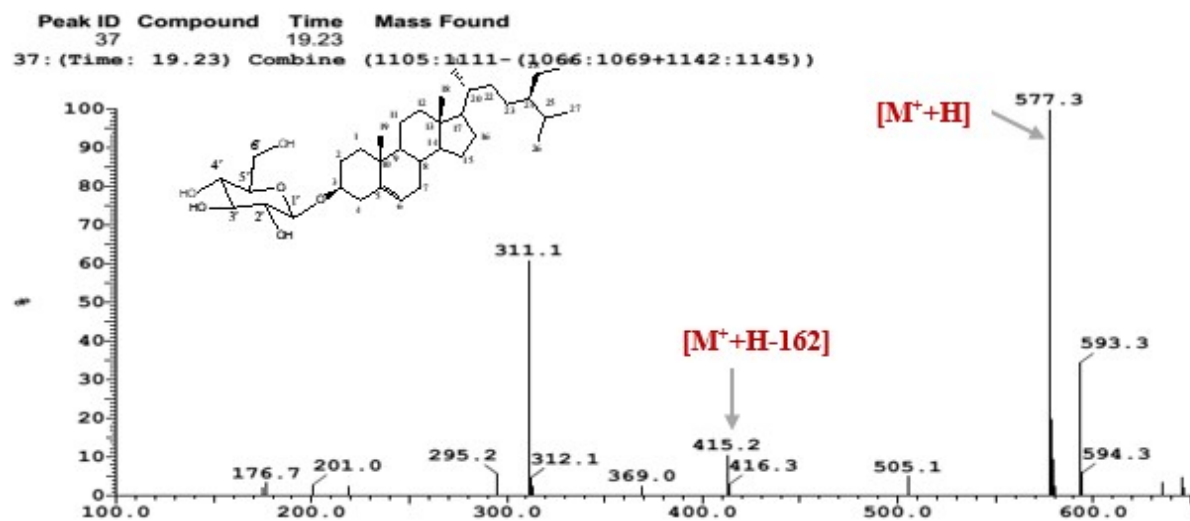

Figure (S24): ESI-MS spectrum (positive mode) of compound "9".

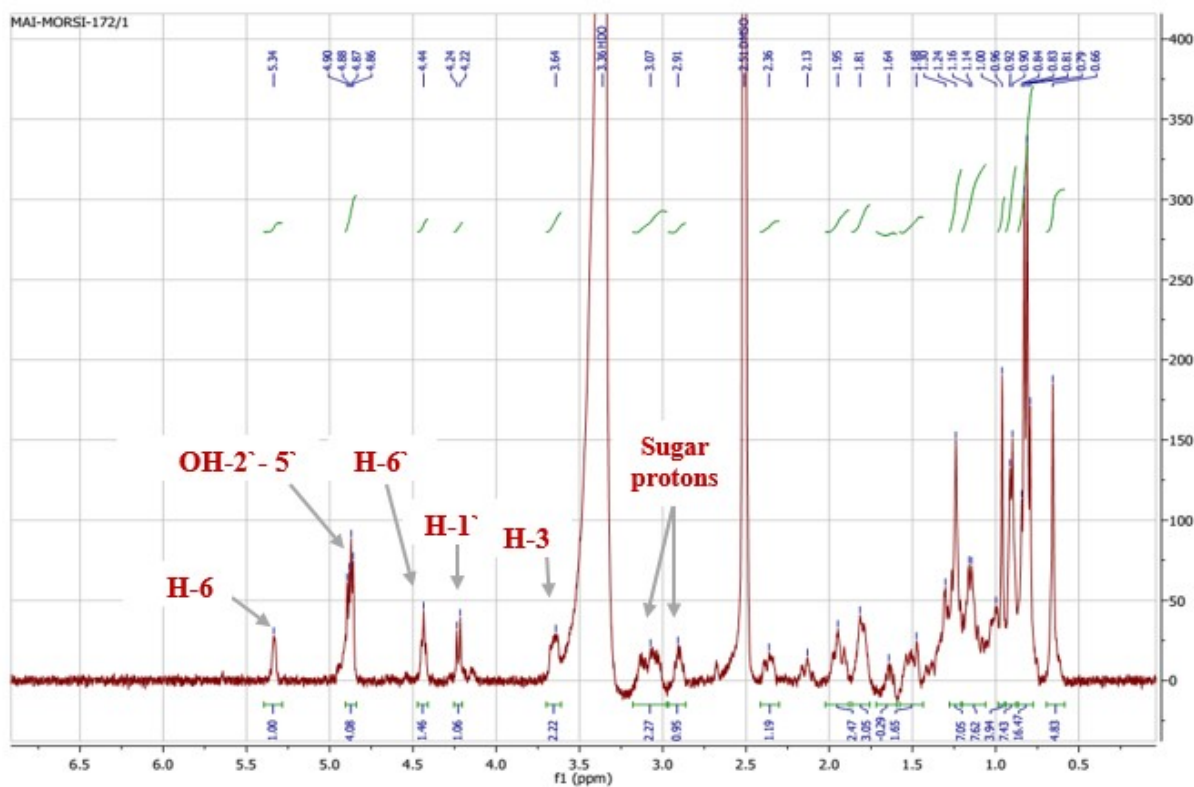

Figure (S25): <sup>1</sup>H-NMR spectrum of compound "9".

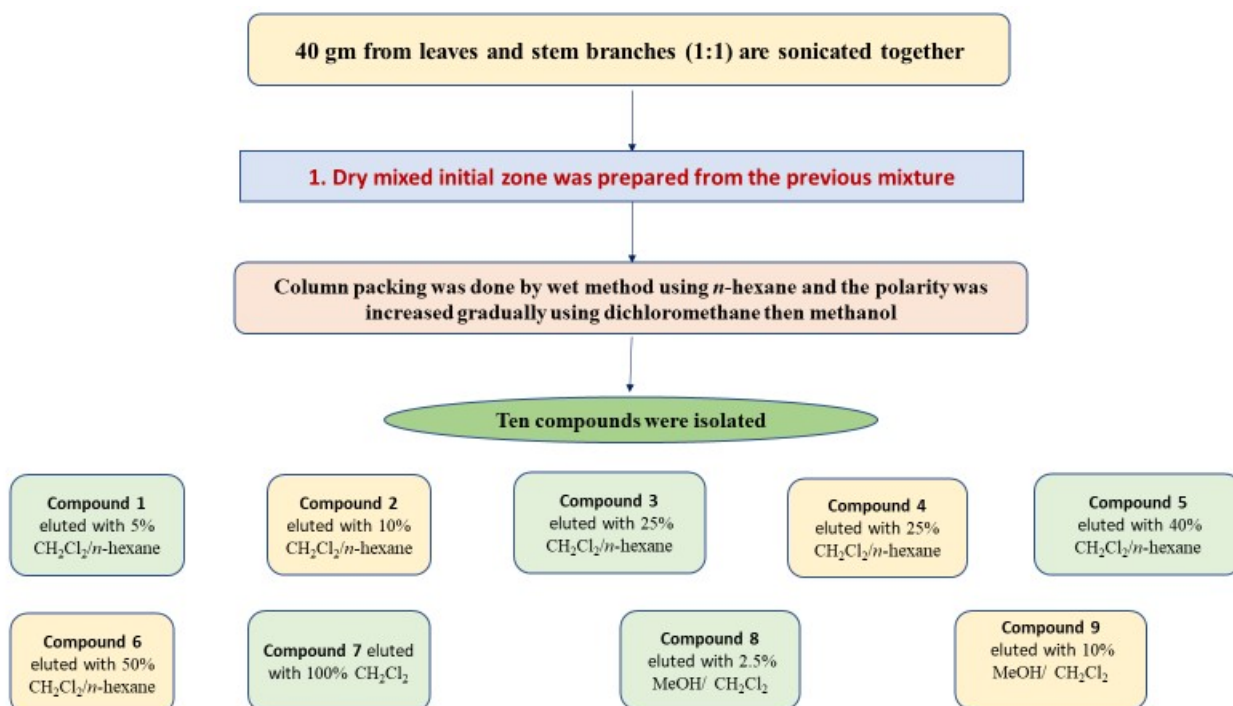

**Scheme S1:** Column chromatography for isolation of secondary metabolites from DCM fractions mixture of *M. macroura* leaves and stem branches.
